1 CLINICAL TRIAL REPORT

2 Unger-Manhart et al

3 **Demonstration of a Decongestant Effect of “Coldamaris**  
4 **Akut” Compared to Saline Nasal Spray in Participants**  
5 **Suffering from Seasonal Allergic Rhinitis**

6

7 Nicole Unger-Manhart<sup>1\*</sup>

8 Martina Morokutti-Kurz<sup>1\*</sup>

9 Petra Zieglmayer<sup>2,4,</sup>

10 Patrick Lemell<sup>2</sup>

11 Markus Savli<sup>3</sup>

12 René Zieglmayer<sup>2</sup>

13 Hanna Dellago<sup>1</sup>

14 Eva Prieschl-Grassauer<sup>1</sup>

15

16 <sup>1</sup> Marinomed Biotech AG, Korneuburg, Austria;

17 <sup>2</sup> Power Project GmbH, Vienna Challenge Chamber Vienna, Austria;

18 <sup>3</sup> Biostatistik & Consulting GmbH, Zuerich, Switzerland;

19 <sup>4</sup> Competence Center for Allergology and Immunology, Department of General Health Studies,  
20 Karl Landsteiner Private University for Health Sciences, Krems, Austria.

21

22 \*These authors contributed equally to this work.

23

24 Correspondence: Eva Prieschl-Grassauer, Marinomed Biotech AG, Hovengasse 25, 2100

25 Korneuburg, Austria. Tel +43 226292300, E-mail: [office@marinomed.com](mailto:office@marinomed.com)

## 26 Abstract

27 **Purpose:** Carrageenan-containing nasal sprays are known to alleviate symptoms of common cold  
28 and allergic symptoms by building a barrier against airborne intruders. The objective of this study  
29 was to develop a hyperosmolar nasal spray with barrier-forming properties and to demonstrate its  
30 decongestant effect in the context of allergic rhinitis.

31 **Methods:** The efficacy of the nasal spray components was first demonstrated *in vitro* by a virus  
32 replication inhibition, water absorption, and barrier assay. Clinical efficacy was assessed in a  
33 randomized, controlled, crossover trial, where adults with a history of severe seasonal allergic  
34 rhinitis were exposed to grass pollen allergens under controlled conditions for a total of 6 hours.  
35 Participants received either the carrageenan- and sorbitol containing nasal spray (CS) or saline  
36 solution (SS) after 1h45min of allergen exposure. After one week, participants repeated the  
37 exposure, receiving the treatment (CS or SS) they had not received before. The primary efficacy  
38 endpoint was the mean change in 'Nasal Congestion Symptom Score' (NCSS) during the allergen  
39 exposure. Secondary efficacy endpoints were nasal airflow, nasal secretion, total nasal symptom  
40 score (TNSS), total ocular symptom score (TOSS) and total respiratory symptom score (TRSS).

41 **Results:** Preclinical assays showed virus-blocking, barrier building and water withdrawing  
42 properties of the CS components. In the clinical study, a total of 46 participants were screened, 41  
43 were randomized and 39 completed the study. There was no significant difference in mean NCSS  
44 change from pre- to post-treatment between CS and SS (mean difference of 0.02 [95% CI -0.19;  
45 0.24] during the first 2 hours after treatment) when analyzed by intention-to-treat. However, nasal  
46 airflow increased over time after treatment with CS, while it declined after SS, leading to a growing  
47 difference in airflow between CS- and SS-treated participants ( $p=0.039$  at 6:00h). The anterior  
48 nasal airflow increased after treatment in 23/38 (61%) of the CS treated participants, compared to  
49 only 13/38 (34%) of the SS treated participants ( $p=0.024$ ). The mean nasal secretion over 2-6 h  
50 was reduced by 1.00 g or -25% after CS ( $p=0.003$ ) compared to pre-treatment, while it was reduced  
51 by only -0.50 g after SS ( $p=0.137$ ). No significant differences in TNSS, TOSS and TRSS were  
52 observed between CS and SS treatments.

- 53 **Conclusion:** CS builds a barrier at the mucosa against viruses and dust and is safe and effective  
54 in alleviating nasal congestion, nasal airflow and nasal secretion in adults with grass pollen allergy.
- 55 **Trial registration:** NCT04532762
- 56 **Keywords:** Allergic rhinitis, nonpharmacological, drug-free, barrier, carragelose, carrageenan

## 57 Introduction

58 Nasal congestion, also described as fullness, blockage, or obstruction of the nasal cavity, is a  
59 frequently described symptom in clinical practice. It can significantly impair quality of life, reduce  
60 daytime productivity at work or school, and negatively impact night-time sleep time and quality.<sup>1</sup>

61 Nasal congestion is usually treated with local decongestants like Xylometazoline or Oxymetazoline.  
62 Unfortunately, rebound swelling of the mucosa is observed upon prolonged use of these topical  
63 vasoconstrictors. This often leads to a gradual overuse and a vicious circle of self-treatment, which  
64 patients are often not aware of.<sup>2,3</sup>

65 Nasal congestion is caused by air-borne irritants like tobacco smoke or dust, or by viruses and  
66 allergens which cause viral and allergic rhinitis and sinusitis, respectively. Allergic rhinitis is a type  
67 I allergic reaction where otherwise innocuous allergens such as pollen or animal dander crosslink  
68 receptor bound IgE on mast cells.<sup>4</sup> This crosslinking results in a biphasic response. The early phase  
69 is characterized by the release of pre-formed mediators such as histamine which cause  
70 characteristic symptoms like pruritus, rhinorrhea, sneezing, and nasal congestion. The late phase  
71 is characterized by the release of newly synthesized mediators such as cytokines and chemokines.  
72 The latter strongly contribute to inflammation and thereby to a worsening of the disease. Seasonal  
73 allergic rhinitis or hay fever is caused by seasonal peaks in the airborne load of pollens and is the  
74 most common type of allergic rhinitis. It is one of the most common chronic conditions in high-  
75 income countries<sup>5</sup> and it is estimated that in Europe, up to 40% of the population suffer from pollen  
76 allergy.<sup>6,7</sup> In contrast to viral rhinitis, which is usually self-limiting with symptom duration of about 1  
77 to 2 weeks, symptoms of allergic rhinitis can continue over longer periods. Allergic patients using  
78 topical decongestion are therefore at higher risk of the rebound effect and would benefit from a  
79 decongestant that does not induce this habituation effect.

80 Marinomed Biotech AG has developed nasal sprays based on iota-carrageenan (Carragelose®), a  
81 natural polymer from red seaweed, which forms a protective layer on mucosal surfaces that  
82 prevents viruses and allergens from interacting with the mucosal surface. Carragelose® is certified  
83 for marketing in the EU, parts of Asia and Australia, as a component of nasal sprays, throat sprays

84 and lozenges. Previous studies have shown that carrageenan-containing nasal sprays have a  
85 broad, non-specific mode of action and prevent attachments of small particles like virus or pollen  
86 to mucosal cells. This has been shown by us and others pre-clinically,<sup>8-10</sup> and clinically.<sup>11-17</sup>  
87 Carrageenan-containing nasal sprays reduce the symptoms of common cold and the viral load in  
88 nasal lavage.<sup>14</sup> Symptom duration is shorter and viral titers in nasal fluids decrease faster in patients  
89 of common cold when treated with carrageenan-containing nasal spray compared to placebo.<sup>12,13</sup>  
90 Since the virus-blocking effect of carrageenan is based on its physical barrier function, we  
91 hypothesized that it can act also against other small particles like pollen, resulting in the alleviation  
92 of AR symptoms.

93 To broaden the beneficial effect of our nasal spray, we wanted to add a decongestant activity by  
94 enhancing the osmolarity of the solution. This causes outflux of water from the nasal mucosa cells,  
95 thereby reducing mucosal swelling and hence nasal congestion. A hypertonic nasal spray  
96 containing carrageenan combines decongestant and anti-viral activity. Hypertonicity could be  
97 achieved by addition of ionic and/or non-ionic osmolarity givers like sodium chloride (NaCl).  
98 However, carrageenans change their conformation depending on the ionic strength of the  
99 environment.<sup>18,19</sup> Enhancing osmolarity using NaCl might therefore affect their anti-viral properties.  
100 Alternatively, hypertonicity could be achieved by adding sorbitol, a water-soluble, membrane  
101 impermeant polyol (sugar alcohol) that is frequently used in food processing to preserve moisture  
102 and add sweetness and texture.

103 Here, we report preclinical in vitro and ex vivo data that are the basis for optimization of the  
104 decongestant nasal spray formulation. Furthermore, we show results of a randomized, controlled,  
105 crossover clinical trial on a decongestant effect of the CS in adults with a history of severe seasonal  
106 allergic rhinitis (SAR). The primary objective of this trial was to demonstrate a decongestant effect  
107 on the nasal mucosa of the CS in comparison with 0.5% saline solution nasal spray (SS). The  
108 secondary objective was to demonstrate the clinical performance of the CS in comparison with  
109 saline solution as assessed by objective measurements of nasal airflow and nasal secretion as well  
110 as patient-reported nasal, ocular and respiratory symptoms.

## 111 **Methods**

### 112 ***Preclinical assays***

#### 113 **In vitro viral inhibition assay**

114 To test if osmolarity could be adjusted with NaCl without compromising the virus-blocking  
115 effectiveness of carrageenan, a series of formulations containing 1.2 mg/ml iota-carrageenan and  
116 0.4 mg/ml kappa-carrageenan with sodium chloride concentrations between 0.5% and 2.3% were  
117 tested against Human rhinoviruses HRV1a and HRV8. Hela cells were seeded in 96-well plates. 4-  
118 fold concentrated serial dilutions of the test sample (CS containing varying concentrations of NaCl)  
119 and 4-fold concentrated virus dilution were prepared. Equal volumes of virus and test sample  
120 dilutions were mixed and incubated at RT for 30 minutes. The mixture was diluted with an equal  
121 volume of medium with 4% fetal bovine serum and antibiotic/antimycotic before it was added to the  
122 cells for infection at a multiplicity of infection (MOI) of 0.7. After 48 hours at 33°C, cells were washed,  
123 and viability was assessed with Alamar Blue staining. Viability was corrected for toxicity of  
124 increasing salt concentrations and normalized to the viability of non-infected cells. The same  
125 experimental set-up was used to test viral inhibition effectiveness of the final formulation of the  
126 commercial product, containing 1.2 mg/ml iota-carrageenan, 0.4 mg/ml kappa-carrageenan, 0.5%  
127 NaCl, and 7% sorbitol in citrate/phosphate buffer. Half-maximal inhibitory concentrations (IC<sub>50</sub>)  
128 were calculated with XLfit Excel add-in version 5.3.1. Results were normalized to toxicity and non-  
129 infected control.

130 All percentages referring to nasal spray components here and in the following subsections are %  
131 weight/volume.

132

#### 133 **Hemagglutination assay**

134 This assay was applied to assess anti-viral activity against coronavirus hCoV OC43. On a 96-well  
135 plate, two hemagglutination units of hCoV OC43 per well are incubated with a semi logarithmic

136 dilution series of test or control samples for 10 min at RT (final concentrations: 0.002-3µg/ml iota-  
137 carrageenan diluted in 0.5% to 2.6% NaCl with or without 7% sorbitol and McIlvaine buffer). A  
138 suspension of chicken red blood cells (1% v/v in PBS) is added to each well to allow  
139 hemagglutination of RBCs by the virus for 1.5 hrs at 4°C. At the time point of assay evaluation,  
140 control RBCs in the absence of carrageenan are fully agglutinated by the virus, whereas inhibition  
141 of hemagglutination can be observed in samples treated with carrageenan up to a certain dilution  
142 factor. The minimal inhibitory concentration of each sample is noted for comparison of the anti-viral  
143 effectiveness of each sample under these assay conditions. As an internal control, a specific batch  
144 of iota-carrageenan is used (assay reference).

### 145 **Ex vivo dehydration assay**

146 The swine nasal mucosa was received from “University Clinic for Swine” at the University of  
147 Veterinarian Medicine Vienna. The nasal mucosa was excised from euthanized pigs and punched  
148 out into equal circular pieces with a diameter of 10mm. The mucosa pieces were weighed and put,  
149 the mucosa-site upward, into 48-well plates. 250 µl test solution was added to each well. Test  
150 solutions were iota- and kappa-carrageenan with 0.5% NaCl and 7% sorbitol; iota- and kappa-  
151 carrageenan with 0.5% NaCl without sorbitol; and a 2.4% NaCl solution. The plate was incubated  
152 for 60 minutes at 37°C, after which the mucosa pieces were weighed again.

### 153 **In vitro barrier assay**

154 A 1.25% agar solution was filled into the wells of a 96-deep-well plate and was left to solidify o/n  
155 at 4°C. 200 µl of CS and of negative control were added on top of the agar block. The negative  
156 control sample contained sorbitol and NaCl in same concentration as in CS but did not contain the  
157 barrier forming component carrageenan. Fluorescent beads of 0.3 µm or 1.0 µm, respectively, were  
158 added and incubated for 3h at RT. Following multiple wash steps with 0.5% NaCl solution, beads  
159 were extracted from agar blocks using 0.1% Tween20 in PBS o/n at 4°C with 900rpm shaking.  
160 Extraction supernatants were transferred into a 96-well black flat bottom plate and analyzed in a

161 plate photometer with an excitation and emission wavelength of 485nm and 520nm, respectively.

162 Percent blocking was calculated relative to the amount of beads extracted from the negative control.

## 163 ***Clinical study***

### 164 **Study design**

165 This was a prospective, controlled, double-blinded randomized two-way cross-over single site study  
166 in adult female and male participants with severe grass pollen induced seasonal allergic rhinitis  
167 (SAR). The study evaluated two treatments, namely the carrageenan- and sorbitol containing nasal  
168 spray (CS) and a saline solution (SS) nasal spray. The study was conducted at the Vienna  
169 Challenge Chamber (VCC) in Vienna, Austria. The Ethics Committee of the City of Vienna oversaw  
170 trial conduct and documentation. The study was designed to include 5 visits. At visit 1 (screening  
171 visit), participants were screened for appropriate allergic response. At visit 2, which could be done  
172 on the same day as visit 1, medical and allergic history and inclusion/exclusion criteria were  
173 assessed and blood samples for safety lab were withdrawn. At visit 3, scheduled 7 days after visit  
174 2, participants were randomized to one of the two treatment arms (CS or SS) in a fully blinded  
175 fashion (details of randomization see below) and underwent their first six-hour allergen challenge  
176 session. Approximately 1 hour and 45 minutes after start of allergen exposure, participants were  
177 dosed with the treatment they had been randomized to, and continued exposure for a total of 6  
178 hours. (first treatment block). At visit 4, scheduled 7 days after visit 3 to allow complete symptom  
179 relief from the previous challenge, participants were exposed to the second allergen challenge  
180 (second treatment block) and crossed over to the treatment that they had not received in the first  
181 block. A follow-up visit (end of study visit, visit 5) was scheduled one week after the second  
182 treatment block. Participants were asked to record AEs and the use of concomitant medications for  
183 the entire duration of the trial.



## 184 **Participants**

185 Participants were female and male adults aged between 18 and 65 years of any ethnicity/race, with  
186 a documented clinically relevant allergic history of moderate to severe SAR to grass pollen for the  
187 previous two years. Participants were selected from the VCC database and had to satisfy all  
188 inclusion and exclusion criteria to be enrolled into the study. Key inclusion criterion was a moderate  
189 to severe response to standard grass pollen allergen mixture within the first 2 hours in the VCC,  
190 defined as total nasal symptom score (TNSS) of at least 6 (out of 12) with the necessity to score at  
191 least “moderate = 2” for the single symptom ‘nasal congestion’. TNSS is the sum of ‘nasal  
192 congestion’, ‘rhinorrhea’, ‘itchy nose’ and ‘sneezing’, each scored on a categorical scale from 0 to  
193 3. In addition, participants had to fulfill the following inclusion criteria: a positive Skin Prick Test  
194 (SPT) response (wheal diameter at least 3 mm larger than diluent control) to grass pollen solutions  
195 (standard Allergopharma) at screening or within the last 12 months prior to study start; positive  
196 serum specific IgE against recombinant major allergen components of the used grass pollen e.g.,  
197 g6 (specific CAP IgE  $\geq 0.70$  kU/L) at screening or within the last 12 months prior to study start; and  
198 a forced expiratory volume in 1 second (FEV1) of at least 80% of reference value<sup>20</sup> at screening.  
199 Asthma patients were allowed into the study only if the asthma condition was mild or intermittent,  
200 and if not treated with steroids. Exclusion criteria comprised prior and ongoing conditions, diseases  
201 and treatments that may interfere with the study intervention and outcomes. Female participants of  
202 child-bearing potential were required to use birth control.

## 203 **Randomization and blinding**

204 Randomization numbers were allocated to the study participants in ascending order of their  
205 Screening Numbers following their attendance at Visit 3 (first treatment block). They were  
206 randomized using a cross-over randomization with balanced blocks. All personnel involved in the  
207 study, including investigators, site personnel, and sponsor’s staff were blinded to the randomization  
208 codes. Persons responsible for labeling of investigational products were un-blinded, but not  
209 involved in other study activities. Un-blinding occurred at the end of the study.

## 210 **Interventions and procedures**

211 During each treatment period, participants were exposed to standard grass pollen allergen mixture  
212 in the VCC for six hours using a validated method.<sup>21,22</sup> During the challenge session, participants  
213 were under constant supervision by, and could communicate with, medical staff outside the  
214 chamber. The chamber was charged with 100% fresh air, which was conditioned (filtered, heated,  
215 dried, cooled, and humidified) and then loaded with the challenge agent, a mixture of four grass  
216 pollen species (Timothy, Orchard, Perennial rye and Sweet vernal grass) (Allergon SB, Sweden).  
217 Air temperature (24°C), humidity (40%) and allergen load (1500 grains/m<sup>3</sup>) were constantly  
218 monitored and maintained. During the 6 hours challenge, subjective nasal symptoms (nasal  
219 congestion, rhinorrhea, itching, sneezing) as well as ocular and respiratory symptoms were  
220 recorded every 15 minutes. Nasal airflow was measured by active anterior rhinomanometry (AAR)  
221 at a pressure difference of 150 Pascal across the nasal passages (sum of the right and left nostril  
222 values). Nasal airflow was evaluated immediately before and every 30 minutes during exposure,  
223 with an additional assessment at timepoint 2h 15min. Nasal secretion was evaluated by weighing  
224 paper tissues used by the participants during their stay in the chamber and collected every 30  
225 minutes. 1h 45min after entering the challenge chamber, i.e., after developing pronounced allergic  
226 nasal symptoms including nasal congestion, participants applied 1 puff per nostril of either CS or  
227 SS. This resulted in a residual observation period of 4h 15min.  
228 CS contained 1.2mg/ml iota-carrageenan, 0.4 mg/ml kappa-carrageenan, 7% (w/v) sorbitol, 0.5%  
229 (w/v) sodium chloride, 1 mg/ml ethylene diamine tetra acetate, buffer and purified water. SS  
230 contained 0.5% sodium chloride in water.

## 231 **Endpoints**

232 The primary efficacy endpoint was the mean difference between CS and SS of the 'Nasal  
233 Congestion Symptom Score' (NCSS) measured every 15 min during allergen exposure. Secondary  
234 efficacy endpoints were nasal airflow as assessed by active anterior rhinomanometry, total nasal  
235 symptom score (TNSS; sum of the symptoms 'nasal congestion', 'rhinorrhea', 'itchy nose', and  
236 'sneezing'), total ocular symptom score (TOSS; sum of the symptoms 'ocular itching', 'redness',

237 'watery eyes'), total respiratory symptom score (TRSS; sum of the symptoms 'cough', 'wheeze',  
238 'dyspnea'), and nasal secretion. Each individual symptom of NCSS, TNSS, TOSS and TRSS was  
239 rated on a scale from 0 to 3, whereas "0" corresponded to "no symptoms", "1" to "mild symptoms"  
240 (easy to tolerate), "2" to "moderate symptoms" (bothersome, but tolerable) and "3" to "severe  
241 symptoms" (hard to tolerate). Safety assessments included frequency and severity of AE, related  
242 AE and serious AE (SAE) throughout the study. In addition, vital signs (blood pressure, pulse rate,  
243 temperature and breathing frequency) were assessed at every visit, pre-and post-challenge. Lung  
244 function was assessed at screening as well as before allergen challenge and every 2 hours during  
245 the allergen challenge by measuring the Forced Expiratory Volume in 1 second (FEV<sub>1</sub>) using a  
246 Piston Spirometer. Physical examination, laboratory blood analysis and ECG were conducted at  
247 screening and at the follow-up visit.

## 248 **Statistical analysis**

249 Sample size calculation was based on the expectation of a mean difference of 0.6 points with  
250 standard deviation of 1.1 (SS = 2, CS = 1.4, effect size  $d=0.56$  and a power = 90%) which was  
251 derived from previous studies. Thus,  $n=36$  participants were needed at an alpha level of  $p=0.05$ .  
252 Considering the dropout rate of 10-15%, up to 50 participants needed to be screened to randomize  
253 about 42 participants in order to get evaluable data from at least 36 participants.

254 Safety analyses including vital signs, laboratory data and AEs, were carried out in the safety  
255 population defined as all participants starting the challenge provocation qualification session.

256 Efficacy was analyzed in the Full Analysis Set (FAS) and in the Per-Protocol Set (PPS). The FAS  
257 comprised all participants who were randomized and was analyzed following the intent-to-treat  
258 (ITT) principle, according to the treatment they have been assigned at randomization. The PPS  
259 comprises all participants in the FAS who did not have any clinically important protocol deviation.

260 The primary efficacy variable was analyzed in a confirmatory way between the two conditions CS  
261 and SS, assuming superiority for CS versus SS. The null hypothesis was defined as:

262 *Mean NCSS [Delta pre-treatment (1:45h) - post-treatment (mean 2-4h)] {CS} ≤ Mean NCSS [Delta*  
263 *pre-treatment (1:45h) - post-treatment (mean 2-4h)] {SS}*

264 The alternative hypothesis was formally defined as:

265  $Mean\ NCSS\ [Delta\ pre-treatment\ (1:45h) - post-treatment\ (mean\ 2-4h)]\ \{CS\} > Mean\ NCSS\ [Delta$   
266  $pre-treatment\ (1:45h) - post-treatment\ (mean\ 2-4h)]\ \{SS\}$

267 A 95% confidence interval for the mean difference of the two treatments was calculated. The  
268 superiority comparison of CS versus SS was performed using analysis of variance (ANOVA)  
269 appropriate for the cross-over design. Period (first or second treatment block) was included in the  
270 analysis model as a fixed effect to confirm the assumption of no period effect. Participant was  
271 included in the model as a random effect. Superiority was to be postulated if the lower bound of the  
272 95% confidence interval was  $>0$ .

273 Secondary efficacy variables were analyzed in an explorative sense and are presented using  
274 descriptive methods. Exploratory efficacy analysis was performed for mean differences between  
275 the two treatments for consecutive intervals from 2h onward to 6h analogous to the primary efficacy  
276 analysis. Respective statistical tests and p-values are to be regarded as descriptive and not as  
277 tests of hypotheses.

278 All attempts were made to collect all data per protocol. Missing or invalid data was neither replaced  
279 nor extrapolated. Outliers were not excluded from the primary analyses. Significance level was set  
280 to  $\alpha=5\%$ . R version 4.0.3 was used for all statistical analyses.

## 281 Results

### 282 *Results Part 1: Preclinical Development*

283 Carrageenan containing nasal sprays are used to prevent and treat viral infections of the respiratory  
284 tract by blocking the viruses' attachment to the mucosa. To enhance the benefit and broaden the  
285 applicability of the barrier-forming nasal spray, a decongestant effect should be added to the  
286 formulation. Usually, intranasally applied hyperosmotic saline solutions are used to withdraw water  
287 from the nasal mucosa, thereby reducing intranasal swelling. However, we found that increasing  
288 salt concentrations reduced the carrageenan's capacity to block the attachment of human  
289 rhinovirus and of human coronavirus to cells. As shown by IC<sub>50</sub> values in **Table 1**, increasing sodium  
290 chloride concentrations reduced the virus-blocking capacity of the carrageenan against human  
291 rhinovirus HRV1 and HRV8 as well as against Coronavirus hCoV OC43 in a dose-dependent  
292 manner. Therefore, the formulation was adjusted to 0.5% sodium chloride to preserve the  
293 carrageenan's beneficial virus-blocking effect. To achieve hyperosmotic activity, sorbitol was added  
294 to the formulation at a concentration of 7%, which increased the formulation's osmolality, but in  
295 contrast to high concentrations of sodium chloride, preserved the virus-blocking activity of  
296 carrageenan (also shown in **Table 1**).

297 After confirming that addition of buffer did not influence the antiviral activity of carrageenan (data  
298 not shown), the final product was formulated with 1.2 mg/ml iota-carrageenan, 0.4 mg/ml kappa-  
299 carrageenan, 0.5% NaCl, 7% sorbitol in citrate/phosphate buffer with an osmolality of 787  
300 mosmol/kg, corresponding to the osmolality of hyperosmolar saline solutions with concentrations  
301 of 2.3-3%. This formulation was then used for ex vivo experiments as well as for the clinical study.  
302 Ex vivo experiments showed that incubation of nasal porcine mucosa with CS or a 2.4% saline  
303 solution of similar osmolality withdrew considerable amounts of liquid from the mucosa, resulting in  
304 a weight loss of 21±5% and 14±8%, respectively. In comparison, the weight of the mucosa  
305 incubated with carrageenan in 0.5% NaCl remained equal (weight change of 1±6%), indicating that  
306 the hyperosmolality alone, and not the carrageenan, is responsible for the weight loss (**Figure 1**).

307 These results demonstrate a beneficial effect of sorbitol when added to the CS that could support  
308 nasal decongestion via its water draining properties.

309 A proof of principle for the barrier function of carrageenan in the formulation containing 7% sorbitol  
310 and 0.5% NaCl was demonstrated by an in vitro barrier assay. This assay tests the ability of a  
311 sample solution to inhibit diffusion of fluorescent beads, serving as surrogate for particulate matter,  
312 into an agar block. As shown in **Figure 2**, CS nasal spray exhibited a blocking activity of  $99\pm 0\%$  for  
313 beads of  $0.3\ \mu\text{m}$  diameter, and of  $80\pm 2\%$  for beads of  $1.0\ \mu\text{m}$  diameter. This means that the  
314 protective layer formed by carrageenan allowed only 1% and 20%, respectively, of beads to reach  
315 the agar block, compared to the negative control. This indicates that the nasal spray can provide  
316 protection against external particles that might trigger or worsen allergic reactions.

## 317 **Results Part 2: Clinical Study**

318 The potential of the CS to treat nasal congestion in humans was examined in a clinical study in  
319 patients with allergic rhinitis. **Figure 3, Panel A** gives a graphical overview of the study, **Panel B**  
320 depicts the assessment carried out during each treatment block. Between September and October  
321 2020, a total of 46 participants were screened after giving informed consent and were included in  
322 the safety population. Of these, 41 participants fulfilled all in/exclusion criteria, were randomized to  
323 one of the two possible treatment sequences, and hence constitute the FAS. 2 participants  
324 discontinued, and 4 participants did not respond to either treatment with CS or SS and were thus  
325 excluded from the per PPS based on the finding that hypertonic saline nasal spray has no effect  
326 on nasal congestion in approximately 30% of the population.<sup>23</sup> No other exclusionary protocol  
327 deviations were reported. **Figure 4** shows the flow of participants through the study.

328 Demographic characteristics are summarized in **Table 2**. 27/46 (59%) of the participants were  
329 females, 19/46 (41%) were males. Participants were aged between 21 and 62 years, with a mean  
330 age of 34.6 years (SD 10.9). The mean BMI was  $23.9\ \text{kg/m}^2$ , all participants' BMIs were below 30,  
331 i.e., none of the participants was obese. All participants had a history of moderate to severe  
332 seasonal allergic rhinitis (SAR) to grass pollen with a prior duration of between 8 and 43 years, on  
333 average 23.5 years.

334 In the following, all efficacy results are shown for the FAS, analyzed by ITT. Results for the PP were  
335 similar as for the FAS.

336 All participants developed nasal congestion upon the start of the allergen challenge. The mean  
337 NCSS increased notably already after 15 min, further increased until timepoint 1h 45min, and was  
338 reduced upon intake of either CS or SS (**Figure 5A**). The overall mean NCSS was 0.1 (SD 0.3)  
339 before starting the allergen challenge (timepoint 00:00) and it increased to 2.3 (SD 0.7) after CS  
340 treatment group and 2.2 (SD 0.5) after saline solution treatment at timepoint 1h45min  
341 (**Supplementary Table S1**). However, only a small difference of 0.16 (SD 0.50) for CS and 0.11  
342 (SD 0.53) for SS between pre-treatment NCSS (timepoint 1h45min, i.e., directly before the  
343 treatment), and the mean NCSS across the time interval 2-4h could be detected (**Supplementary**  
344 **Table S2**). No phase-effect (p-value >0.05, Wilcoxon test) and no carry-over effect (p-value >0.05,  
345 ANOVA) was observed. The mean difference between CS [Pre-treatment -  $\varnothing$ (2-4h)] and SS [Pre-  
346 treatment -  $\varnothing$ (2-4h)] across all participants was 0.02, 95% CI [-0.19;0.24], p >0.05 (paired t-test)  
347 (**Figure 5B**). With the lower bound of the 95% confidence interval <0, superiority of CS versus SS  
348 in terms of NCSS could not be established.

349 **Figure 6** shows the absolute nasal airflow in both treatments before treatment (timepoint 1h45min)  
350 and at the end of the allergen challenge period. In total, an increased anterior nasal airflow was  
351 measured in 23/38 (61%) of the participants after treatment with the CS, but in only 13/38  
352 participants (34%) after SS treatment (**Table 3**). This difference between treatments was  
353 statistically significant (p=0.024, McNemar's test for paired nominal data).

354 In order to unravel the temporal dynamics that led to the post-treatment differences, we also  
355 followed nasal airflow changes over time by subtracting the mean pre-treatment value (timepoint  
356 1h30min) from the mean post-treatment value of varying post-treatment periods (mean over 2-6h,  
357 2:15-6h, 2:30-6h etc.). Positive values indicate higher nasal airflow post-treatment compared to  
358 pre-treatment. As shown in **Supplementary Figure S1**, treatment with the CS led to an increase  
359 of nasal airflow over the course of the 4 hours residual observation time compared to pre-treatment,  
360 while it declined in the SS group. This led to a significantly higher airflow in the CS group compared  
361 to the SS group at the end of the 6 hours treatment block: The difference between CS and SS in

362 nasal airflow change from pre-treatment to the end of the 6h treatment block in the FAS (ITT)  
363 population was 54.29 ml/s (95% CI 2.92; 105.66). The difference was significantly in favor of the  
364 CS (p=0.04, paired t-test) (**Supplementary Table S3**).

365 Changes in nasal secretion from pre- to post-treatment were calculated in an analogous manner.  
366 In both groups, nasal secretion declined post-treatment when compared to pre-treatment. The  
367 difference in nasal secretion from pre- to post-treatment was more pronounced in the CS group  
368 than in the SS group (**Figure 7**). For the CS, the weight of nasal secretion changed from 3.99 g at  
369 pre-treatment to 2.99 g averaged over the entire residual observation time (2-6h), representing a  
370 mean tissue weight difference of -1.00 g or -25% (p=0.003, t-Test). After SS, the mean tissue weight  
371 difference from pre-treatment to 2-6h, was only -0.50 g (p=0.137, Wilcoxon signed rank test). These  
372 results indicate that nasal secretion declined more strongly after CS than after SS treatment (**Table**  
373 **4 and Figure 7**).

374 TNSS, TOSS and TRSS over the 6 hours treatment block did not show any pronounced differences  
375 between CS and S group (data not shown).

376 In the safety population, a total of 3 adverse events occurred in 2 participants during the trial:  
377 pyrexia (mild), nasopharyngitis (moderate) and pharyngitis (severe) (**Table 5**). Pharyngitis and  
378 pyrexia occurred in the same participants 4 days after the first treatment block with SS.  
379 Nasopharyngitis occurred 4 days after the first treatment block with CS. None of them was  
380 considered related to the study treatment, none was serious, all were resolved by study end. Both  
381 participants missed the second treatment block and terminated the trial prematurely due to these  
382 AEs.

383 All vital signs and laboratory values showed no particular differences between baseline and follow-  
384 up visit (data not shown), indicating good tolerability of both allergen challenge and treatment with  
385 CS and saline solution.



## 386 Discussion

387 This paper includes preclinical and clinical data demonstrating the safety and efficacy of a  
388 carrageenan- and sorbitol -containing (CS) nasal spray. The in vitro/ex vivo data indicate that the  
389 formulation is osmotically active while preserving the barrier-forming, virus-blocking capacity of the  
390 carrageenan. The clinical data show that the CS nasal spray is safe and well tolerable in  
391 participants with moderate to severe SAR. Although the primary endpoint based on the subjective  
392 rating of nasal congestion was not met, two objective parameters, nasal airflow and nasal secretion,  
393 showed a significant improvement upon treatment with CS nasal spray. Nasal airflow increased  
394 upon CS administration, but decreased upon administration of saline solution, leading to a  
395 significantly higher airflow in CS treated participants at the end of the challenge. The majority (60%)  
396 of participants had an increased nasal airflow after CS, but only 34% had an increased nasal airflow  
397 after SS administration. The amount of nasal secretion was reduced both after CS and SS  
398 administration, but this reduction was significant only after the CS. The low incidence of adverse  
399 events, none of them considered treatment-related, suggested safety of CS nasal spray similar to  
400 saline solution used in this study and similar to carrageenan-only (no sorbitol) nasal spray as  
401 demonstrated in previous studies.<sup>11-14,16,24,25</sup>

402 The beneficial effect of the CS nasal spray is presumable achieved via multiple modes of action  
403 attributed to carrageenan and sorbitol. First, carrageenan has excellent mucoadhesive properties  
404 that are e.g. exploited for intranasal drug delivery.<sup>26</sup> We hypothesize that a mucoadhesive layer of  
405 carrageenan forms a protective barrier in the nasal mucosa that prevents small particles like pollen  
406 and dust to enter the nasal mucosa and hinders further induction or aggravation of AR symptoms  
407 like nasal congestion and nasal secretion.<sup>17</sup>

408 Secondly, polyols like sorbitol are known and widely used as humectants in the cosmetics and food  
409 industry based on their hygroscopic properties.<sup>27</sup> In the context of rhinitis, xylitol, another polyol  
410 with similar properties as sorbitol, was shown to keep the nasal passages and sinuses moist and  
411 clean for a longer time than saline alone. 5-days-use of a hyperosmolar xylitol-containing nasal  
412 spray led to significant improvement of the overall quality of life score compared to pre-treatment

413 in participants suffering from nasal obstruction.<sup>28</sup> Moreover, a xylitol solution was as effective in the  
414 treatment of rhinitis medicamentosa in rats as the glucocorticoid mometasone in the reversal of  
415 histopathological changes caused by long-term treatment with oxymetazoline.<sup>29</sup>

416 Strengths of this study include the cross-over design, in which each participant serves as their own  
417 control, the random assignment to minimize possible effects from the order of treatments, and the  
418 blinding of investigators, site personnel, and the sponsor's staff. Another strength is the use of an  
419 environmental challenge chamber to induce AR symptoms, which allows to control environmental  
420 conditions like temperature, humidity, and allergen type and concentration, and thus enables the  
421 performance of allergology studies out of allergy season and under uniform allergen exposure  
422 conditions. This limits variation and helps reducing the number of study participants. Moreover, use  
423 of the challenge chamber allows the study personnel to supervise administration of medication and  
424 documentation of outcomes, thereby enhancing participant compliance.<sup>30-36</sup>

425 The study has several limitations. One of them is the selection of the NCSS, a subjective scoring  
426 scale, as primary endpoint. The rationale for the selection of the primary endpoint was that nasal  
427 congestion comes with a significant impact upon patients' QOL, which is considered an important  
428 determinant of the severity of nasal diseases.<sup>37,38</sup> In fact, the degree of health-related QOL  
429 impairment has been demonstrated to drive patients' choice between treatment options.<sup>39</sup>

430 Assessment of QOL in the form of patient reported outcome measures (PROMs) is regarded a  
431 standard outcome measures in clinical trials, acknowledging the fact that the classical, objective  
432 outcome variables may only partially characterize the disease of the patient. However, the focus  
433 on a PROM as primary endpoint also poses problems due to the low degree of correlation between  
434 subjective and objective outcomes assessing nasal symptoms, as systematically reviewed by Ta  
435 et al.<sup>40</sup> The authors consequently recommend to use objective outcome measures to complement  
436 and confirm validated patient reported outcomes.<sup>40</sup>

437 The findings of our study support this conclusion, showing discrepancies between subjective and  
438 objective evaluations. As described in the results section, only very slight differences between  
439 groups and between timepoints were observed by NCSS that may possibly reach significance only  
440 with a much larger sample size. In contrast, differences between CS and SS in nasal airflow

441 improvement measured by AAR became significant towards the end of the allergen challenge,  
442 indicating that this sensitive method is able to pick up subtle changes that cannot possibly be  
443 detected by PROMs like the NCSS with the available number of participants. Rhinomanometry  
444 enables the objective and accurate measurement of nasal congestion, and is considered the gold  
445 standard for measuring nasal airway patency and resistance.<sup>41</sup> The method has been  
446 demonstrated to be sensitive in quantifying nasal patency after nasal provocation testing and to  
447 assess the efficacy of medications used to treat nasal congestion/obstruction.<sup>42</sup> The  
448 implementation of rhinomanometry as objective endpoint in addition to the subjective symptom  
449 scores is therefore a particular upside of this study. Analogously, objective determination of nasal  
450 secretion revealed a significant reduction of nasal secretion after treatment compared to pre-  
451 treatment, which was not captured by the TNSS with sufficient sensitivity.

452 In this study, we used the time window from 2 to 4h after start of allergen exposure, that is, starting  
453 15min after treatment administration and ending 2h15min after treatment administration. This  
454 interval was selected based on the expectation that the most pronounced effect of the treatment  
455 would manifest shortly after treatment. The mean residence time of carrageenan at the mucosa of  
456 approximately four hours was determined in a prior study using nasal mucociliary clearance (NMC)  
457 time assessment in healthy volunteers,<sup>15</sup> and we expected the most pronounced effect to manifest  
458 in the first half of this period. However, nasal airflow continuously increased from post-treatment  
459 until the end of the allergen challenge period.

460 In sum, based on our findings, we propose the CS as safe and effective treatment of mild to  
461 moderate AR.

## 462 **Conclusion**

463 Coldamaris akut, a carrageenan- and sorbitol containing nasal spray, is considered safe and  
464 effective in the relief of nasal symptoms in adults with grass pollen allergy.

## 465 **Ethics Statement**

466 The study was conducted in Austria in accordance with in accordance with the Declaration of  
467 Helsinki on Ethical Principles for Medical Research Involving Human Subjects, the International  
468 Council for Harmonisation Guideline on Good Clinical Practice, and all applicable local regulatory  
469 requirements and laws. The study was approved by the Ethics Committee of the City of Vienna  
470 (protocol code COA\_19\_03, EK 19/277/1219). Informed consent was obtained from all study  
471 participants.

## 472 **Acknowledgments**

473 This research was sponsored by Marinomed Biotech AG.

## 474 **Disclosure**

475 NU, MM, HD and EP are employees of Marinomed Biotech AG. MS received consulting fees from  
476 Marinomed Biotech AG. The other authors have no competing interests in this work.

477 This manuscript is also available at medRxiv preprint server.

478

## 479 References

- 480 1. Stewart M, Ferguson B, Fromer L. Epidemiology and burden of nasal congestion. *Int J Gen*  
481 *Med.* 2010 Apr 8;(3):37–45. Available from: [https://www.dovepress.com/epidemiology-and-](https://www.dovepress.com/epidemiology-and-burden-of-nasal-congestion-peer-reviewed-fulltext-article-IJGM)  
482 [burden-of-nasal-congestion-peer-reviewed-fulltext-article-IJGM](https://www.dovepress.com/epidemiology-and-burden-of-nasal-congestion-peer-reviewed-fulltext-article-IJGM).
- 483 2. Graf P. Long-term use of oxy- and xylometazoline nasal sprays induces rebound swelling,  
484 tolerance, and nasal hyperreactivity. *Rhinology.* 1996;34(1):9–13.
- 485 3. Akerlund A, Bende M. Sustained use of xylometazoline nose drops aggravates vasomotor  
486 rhinitis. *Am J Rhinol.* 1991;5(4):157–160.
- 487 4. Zoabi Y, Levi-Schaffer F, Eliashar R. Allergic Rhinitis: Pathophysiology and Treatment  
488 Focusing on Mast Cells. *Biomedicines.* 2022;10(10). doi:10.3390/biomedicines10102486
- 489 5. Bousquet J, Fokkens W, Burney P, et al. Important research questions in allergy and related  
490 diseases: nonallergic rhinitis: a GA2LEN paper. *Allergy.* 2008;63(7):842–853.  
491 doi:10.1111/j.1398-9995.2008.01715.x
- 492 6. D'Amato G, Cecchi L, Bonini S, et al. Allergenic pollen and pollen allergy in Europe. *Allergy.*  
493 2007;62(9):976–990. doi:10.1111/j.1398-9995.2007.01393.x
- 494 7. Wallace DV, Dykewicz MS, Bernstein DI, et al. The diagnosis and management of rhinitis: an  
495 updated practice parameter. *J Allergy Clin Immunol.* 2008;122(2 Suppl):S1-84.  
496 doi:10.1016/j.jaci.2008.06.003
- 497 8. Grassauer A, Weinmuellner R, Meier C, Pretsch A, Prieschl-Grassauer E, Unger H. Iota-  
498 Carrageenan is a potent inhibitor of rhinovirus infection. *Virology.* 2008;5:107.  
499 doi:10.1186/1743-422X-5-107
- 500 9. Morokutti-Kurz M, Fröba M, Graf P, et al. Iota-carrageenan neutralizes SARS-CoV-2 and  
501 inhibits viral replication in vitro. *PLoS One.* 2021;16(2). doi:10.1371/journal.pone.0237480
- 502 10. Fröba M, Große M, Setz C, et al. Iota-Carrageenan Inhibits Replication of SARS-CoV-2 and  
503 the Respective Variants of Concern Alpha, Beta, Gamma and Delta. *Int J Mol Sci.*  
504 2021;22(24). doi:10.3390/ijms222413202

- 505 11. Fazekas T, Eickhoff P, Pruckner N, et al. Lessons learned from a double-blind randomised  
506 placebo-controlled study with a iota-carrageenan nasal spray as medical device in children  
507 with acute symptoms of common cold. *BMC Complement Altern Med.* 2012;12:147.  
508 doi:10.1186/1472-6882-12-147
- 509 12. Ludwig M, Enzenhofer E, Schneider S, et al. Efficacy of a carrageenan nasal spray in patients  
510 with common cold: a randomized controlled trial. *Respir Res.* 2013;14:124. doi:10.1186/1465-  
511 9921-14-124
- 512 13. Koenighofer M, Lion T, Bodenteich A, et al. Carrageenan nasal spray in virus confirmed  
513 common cold: individual patient data analysis of two randomized controlled trials. *Multidiscip*  
514 *Respir Med.* 2014;9(1):57. doi:10.1186/2049-6958-9-57
- 515 14. Eccles R, Meier C, Jawad M, Weinmüllner R, Grassauer A, Prieschl-Grassauer E. Efficacy  
516 and safety of an antiviral Iota-Carrageenan nasal spray: a randomized, double-blind, placebo-  
517 controlled exploratory study in volunteers with early symptoms of the common cold. *Respir*  
518 *Res.* 2010;11:108. doi:10.1186/1465-9921-11-108
- 519 15. Graf C, Bernkop-Schnürch A, Egyed A, Koller C, Prieschl-Grassauer E, Morokutti-Kurz M.  
520 Development of a nasal spray containing xylometazoline hydrochloride and iota-carrageenan  
521 for the symptomatic relief of nasal congestion caused by rhinitis and sinusitis. *Int J Gen Med.*  
522 2018;11:275–283. doi:10.2147/IJGM.S167123
- 523 16. Bichiri D, Rente AR, Jesus Â. Safety and efficacy of iota-carrageenan nasal spray in  
524 treatment and prevention of the common cold. *Med Pharm Rep.* 2021;94(1):28–34.  
525 doi:10.15386/mpr-1817
- 526 17. Unger-Manhart N, Morokutti-Kurz M, Zieglmayer PU, et al. Carrageenan-Containing Nasal  
527 Spray Alleviates Allergic Symptoms in Participants with Grass Pollen Allergy: A Randomized,  
528 Controlled, Crossover Clinical Trial. *Int J Gen Med.* 2024;17:419–428.  
529 doi:10.2147/IJGM.S447359
- 530 18. Schefer L, Adamcik J, Mezzenga R. Unravelling Secondary Structure Changes on Individual  
531 Anionic Polysaccharide Chains by Atomic Force Microscopy. *Angew Chem Int Ed Engl.*  
532 2014;53:5376–5379. doi:10.1002/anie.201402855

- 533 19. Schefer L, Usov I, Mezzenga R. Anomalous stiffening and ion-induced coil-helix transition of  
534 carrageenans under monovalent salt conditions. *Biomacromolecules*. 2015;16(3):985–991.  
535 doi:10.1021/bm501874k
- 536 20. Quanjer PH, Tammeling GJ, Cotes JE, Pedersen OF, Peslin R, Yernault JC. Lung volumes  
537 and forced ventilatory flows: Report Working Party. Standardization of Lung Function Tests,  
538 European Community for Steel and Coal. Official Statement of the European Respiratory  
539 Society. *European Respiratory Journal*. 1993;6(Suppl. 16):5–40. Available from:  
540 [https://erj.ersjournals.com/content/erj/6/Suppl\\_16/5.full.pdf](https://erj.ersjournals.com/content/erj/6/Suppl_16/5.full.pdf).
- 541 21. Day JH, Briscoe MP, Rafeiro E, Ellis AK, Pettersson E, Akerlund A. Onset of action of  
542 intranasal budesonide (Rhinocort aqua) in seasonal allergic rhinitis studied in a controlled  
543 exposure model. *J Allergy Clin Immunol*. 2000;105(3):489–494. doi:10.1067/mai.2000.104550
- 544 22. Devillier P, Le Gall M, Horak F. The allergen challenge chamber: a valuable tool for optimizing  
545 the clinical development of pollen immunotherapy. *Allergy*. 2011;66(2):163–169.  
546 doi:10.1111/j.1398-9995.2010.02473.x
- 547 23. Bergmann C, Müller K, Thieme U, et al. Real-World Data on the Use of Hypertonic Saline  
548 Nasal Spray in ENT Practice. *SN Compr. Clin. Med*. 2019;1(5):354–361. doi:10.1007/s42399-  
549 019-0050-y
- 550 24. Eccles R, Winther B, Johnston SL, Robinson P, Trampisch M, Koelsch S. Efficacy and safety  
551 of iota-carrageenan nasal spray versus placebo in early treatment of the common cold in  
552 adults: the ICICC trial. *Respir Res*. 2015;16(121). doi:10.1186/s12931-015-0281-8
- 553 25. Eccles R. Iota-Carrageenan as an Antiviral Treatment for the Common Cold. *Open Virol J*.  
554 2020;14(1):9–15. doi:10.2174/1874357902014010009
- 555 26. Li C, Liu Z, Li Q, Yan X, Liu Y, Lu W. Enhancement in bioavailability of ketorolac  
556 tromethamine via intranasal in situ hydrogel based on poloxamer 407 and carrageenan. *Int J*  
557 *Pharm*. 2014;474(1-2):123–133. doi:10.1016/j.ijpharm.2014.08.023
- 558 27. Krzysztof Matyjaszewski MM, ed. *Polymer Science: A Comprehensive Reference*: Elsevier;  
559 2012.

- 560 28. Cingi C, Birdane L, Ural A, Oghan F, Bal C. Comparison of nasal hyperosmolar xylitol and  
561 xylometazoline solutions on quality of life in patients with inferior turbinate hypertrophy  
562 secondary to nonallergic rhinitis. *Int Forum Allergy Rhinol.* 2014;4(6):475–479.  
563 doi:10.1002/alr.21311
- 564 29. Cam B, Sari M, Midi A, Gergin O. Xylitol treats nasal mucosa in rhinitis medicamentosa: an  
565 experimental rat model study. *Eur Arch Otorhinolaryngol.* 2019;276(11):3123–3130.  
566 doi:10.1007/s00405-019-05605-3
- 567 30. Kurita J, Yonekura S, Iinuma T, et al. Evaluation of shoseiryuto for seasonal allergic rhinitis,  
568 using an environmental challenge chamber. *World Allergy Organ J.* 2022;15(3):100636.  
569 doi:10.1016/j.waojou.2022.100636
- 570 31. Koriyama M, Okamoto Y, Suzuki T, et al. Characteristics of Japanese cypress pollen-induced  
571 allergic rhinitis by environmental challenge chamber. *Allergol Int.* 2022;71(1):144–146.  
572 doi:10.1016/j.alit.2021.08.013
- 573 32. Yonekura S, Okamoto Y, Sakurai D, et al. Efficacy of Desloratadine and Levocetirizine in  
574 Patients with Cedar Pollen-Induced Allergic Rhinitis: A Randomized, Double-Blind Study. *Int*  
575 *Arch Allergy Immunol.* 2019;180(4):274–283. doi:10.1159/000503065
- 576 33. Ziegelmayer P, Lemell P, Chen KW, et al. Clinical validation of a house dust mite  
577 environmental challenge chamber model. *J Allergy Clin Immunol.* 2017;140(1):266-268.e5.  
578 doi:10.1016/j.jaci.2016.12.986
- 579 34. Okuma Y, Okamoto Y, Yonekura S, et al. Persistent nasal symptoms and mediator release  
580 after continuous pollen exposure in an environmental challenge chamber. *Ann Allergy Asthma*  
581 *Immunol.* 2016;117(2):150–157. doi:10.1016/j.anai.2016.05.015
- 582 35. Krug N, Gupta A, Badorrek P, et al. Efficacy of the oral chemoattractant receptor homologous  
583 molecule on TH2 cells antagonist BI 671800 in patients with seasonal allergic rhinitis. *J*  
584 *Allergy Clin Immunol.* 2014;133(2):414–419. doi:10.1016/j.jaci.2013.10.013
- 585 36. North ML, Soliman M, Walker T, Steacy LM, Ellis AK. Controlled Allergen Challenge Facilities  
586 and Their Unique Contributions to Allergic Rhinitis Research. *Curr Allergy Asthma Rep.*  
587 2015;15(4):11. doi:10.1007/s11882-015-0514-4



- 588 37. Bousquet J, Khaltaev N, Cruz AA, et al. Allergic Rhinitis and its Impact on Asthma (ARIA)  
589 2008. *Allergy*. 2008;63(86). Accessed October 31, 2016.
- 590 38. Rudmik L, Smith TL, Schlosser RJ, Hwang PH, Mace JC, Soler ZM. Productivity costs in  
591 patients with refractory chronic rhinosinusitis. *Laryngoscope*. 2014;124(9):2007–2012.  
592 doi:10.1002/lary.24630
- 593 39. DeConde AS, Mace JC, Bodner T, et al. SNOT-22 quality of life domains differentially predict  
594 treatment modality selection in chronic rhinosinusitis. *Int Forum Allergy Rhinol*.  
595 2014;4(12):972–979. doi:10.1002/alr.21408
- 596 40. Ta NH, Gao J, Philpott C. A systematic review to examine the relationship between objective  
597 and patient-reported outcome measures in sinonasal disorders: recommendations for use in  
598 research and clinical practice. *Int Forum Allergy Rhinol*. 2021;11(5):910–923.  
599 doi:10.1002/alr.22744
- 600 41. Schumacher MJ. Nasal Dyspnea: The Place of Rhinomanometry in its Objective Assessment.  
601 *Am J Rhinol*. 2004;18(1):41–46. doi:10.1177/194589240401800109
- 602 42. Gosepath J, Amedee RG, Mann WJ. Nasal provocation testing as an international standard  
603 for evaluation of allergic and nonallergic rhinitis. *Laryngoscope*. 2005;115(3):512–516.  
604 doi:10.1097/01.MLG.0000149682.56426.6B  
605

606 **Tables**

607 **Table 1: In vitro data: Virus-blocking effectiveness against HRV1a, HRV8 and hCoV OC43.**

608 Minimal inhibitory concentration of the various formulations determined in a virus inhibition assay

609 (for HRV1 and HRV8) or a hemagglutination inhibition assay (for hCoV OC43).

610

| Effectiveness of various formulations                                             | IC <sub>50</sub><br>[µg/ml] | IC <sub>50</sub> 95% CI<br>[µg/ml] |
|-----------------------------------------------------------------------------------|-----------------------------|------------------------------------|
| <b>HRV1a</b>                                                                      |                             |                                    |
| Carrageenan + 0.5% NaCl                                                           | 1.8                         | 0.7; 3.0                           |
| Carrageenan + 0.9% NaCl                                                           | 5.6                         | 4.0; 7.1                           |
| Carrageenan + 2% NaCl                                                             | 26.5                        | 23.0; 30.0                         |
| Carrageenan + 2.3% NaCl                                                           | 40.7                        | 35.0; 46.6                         |
| Fold Change (Carrageenan + 0.5% NaCl) vs. (Carrageenan + 2.3% NaCl)               | 22.3                        |                                    |
| Carrageenan + 0.5% NaCl + 7% Sorbitol                                             | 3,7                         | 2.2; 5.3                           |
| Carrageenan + 2.3% NaCl                                                           | 104,5                       | 82.8; 126.2                        |
| Fold Change (Carrageenan + 0.5% NaCl + 7% Sorbitol) vs. (Carrageenan + 2.3% NaCl) | 27.9                        |                                    |
| <b>HRV8</b>                                                                       |                             |                                    |
| Carrageenan + 0.5% NaCl                                                           | 2.3                         | 1.0; 3.6                           |
| Carrageenan + 0.9% NaCl                                                           | 4.1                         | 2.9; 5.3                           |
| Carrageenan + 2% NaCl                                                             | 8.1                         | 5.5; 10.7                          |
| Carrageenan + 2.3% NaCl                                                           | 15.6                        | 8.8; 22.4                          |
| Fold Change (Carrageenan + 0.5% NaCl) vs. (Carrageenan + 2.3% NaCl)               | 6.9                         |                                    |
| Carrageenan + Buffer + 0.5% NaCl + Sorbitol                                       | 0.8                         | 0.7; 1.0                           |
| Carrageenan + 2.3% NaCl                                                           | 2.3                         | 1.5; 3.1                           |
| Fold Change (Carrageenan + 0.5% NaCl + 7% Sorbitol) vs. (Carrageenan + 2.3% NaCl) | 2.9                         |                                    |
| <b>hCoV OC43</b>                                                                  |                             |                                    |

|                                                                                   |       |      |
|-----------------------------------------------------------------------------------|-------|------|
| Carrageenan + 0.5% NaCl                                                           | 0.007 | n.a. |
| Carrageenan + 0.9% NaCl                                                           | 0.007 | n.a. |
| Carrageenan + 2.0% NaCl                                                           | 0.080 | n.a. |
| Carrageenan + 2.3% NaCl                                                           | 0.080 | n.a. |
| Carrageenan + 0.5% NaCl + 7% sorbitol                                             | 0.007 | n.a. |
| Fold Change (Carrageenan + 0.5% NaCl) vs. (Carrageenan + 2.3% NaCl)               | 11.4  |      |
| Fold Change (Carrageenan + 0.5% NaCl + 7% Sorbitol) vs. (Carrageenan + 2.3% NaCl) | 11.4  |      |

611

612 Note: Bold borders mark individual experiments.

613 Abbreviations: IC<sub>50</sub>, inhibitory concentration neutralizing 50% of the virus; CI, confidence interval; NaCl, sodium chloride;

614 Carrageenan, 1.2 mg/ml iota-carrageenan and 0.4 mg/ml iota-carrageenan; n.a., not applicable.

615

616

**Table 2: Clinical data: Demographic characteristics at baseline (Safety Population)**

|               |                             | 617<br>All 618<br>participants<br>(N=46)<br>619<br>620 |
|---------------|-----------------------------|--------------------------------------------------------|
| Sex           |                             | 621                                                    |
| Female        | n (%)                       | 622<br>27 (59%)<br>623                                 |
| Male          | n (%)                       | 19 (41%)<br>624                                        |
| Ethnicity     |                             | 625<br>626                                             |
| Caucasian     | n (%)                       | 28 (61%)<br>627                                        |
| Not specified | n (%)                       | 18 (39%)                                               |
| Age           | Years (min/max)             | 34.6 (21/62)                                           |
| BMI           | kg/m <sup>2</sup> (min/max) | 23.9 (19.1/29.8)                                       |

Abbreviations: BMI, body mass index.

**Table 3: Clinical data: Improvement/worsening of airflow after 6h compared to pre-treatment (1h30min), evaluated within treatment groups for the FAS.**

628

|                          |                 | CS (360 min - 90 min) |       |
|--------------------------|-----------------|-----------------------|-------|
|                          |                 | better or equal       | worse |
| SS<br>(360 min - 90 min) | better or equal | 10                    | 3     |
|                          | worse           | 13                    | 12    |

629

630

Abbreviations: CS, carrageenan-sorbitol containing nasal spray. SS, saline solution.

631

p-Value: 0.024 (McNemar's test for paired nominal data for comparison between treatments)

632

633 **Table 4: Clinical data: Tissue weight differences between pre-treatment [90 min] and the**  
634 **mean of all post-treatment timepoints [120-360 min] for the FAS.**

635

636

| Treatment | Mean Weight [g] ± SD |                 |                        | p-Value |
|-----------|----------------------|-----------------|------------------------|---------|
|           | Pre-treatment        | After treatment | Difference after - pre |         |
| CS        | 3.99 ± 3.24          | 2.99 ± 2.16     | -1.00 ± 1.96           | 0.003*  |
| SS        | 3.07 ± 2.59          | 2.57 ± 1.87     | -0.50 ± 1.70           | 0.137** |

637

638 Abbreviations: CS, carrageenan-sorbitol containing nasal spray; SS, saline solution; SD, standard deviation.

639 Pre-treatment = mean at timepoint 90min

640 After treatment = mean of all timepoints from 2h to 6h

641 \* t-test (Normality assumption confirmed)

642 \*\* Wilcoxon signed rank test (Normality assumption rejected)

643

644 **Table 5: Clinical data: Adverse events by SOC/PT and severity for the Safety Population**  
645 **(N=46).**

646

| <b>SOC</b>                                                  | <b>PT</b>       | <b>Mild</b> | <b>Moderate</b> | <b>Severe</b> | <b>Total</b> |
|-------------------------------------------------------------|-----------------|-------------|-----------------|---------------|--------------|
| <b>General disorders and administration site conditions</b> |                 | <b>1</b>    | <b>0</b>        | <b>0</b>      | <b>1</b>     |
|                                                             | Pyrexia         | 1           | 0               | 0             | 1            |
| <b>Infections and infestations</b>                          |                 | <b>0</b>    | <b>1</b>        | <b>1</b>      | <b>2</b>     |
|                                                             | Nasopharyngitis | 0           | 1               | 0             | 1            |
|                                                             | Pharyngitis     | 0           | 0               | 1             | 1            |

Abbreviations: SOC, system organ class; PT, preferred term.

647

648 **Supplementary Tables**

649 **Table S1: Clinical data: Nasal congestion symptom score (NCSS) of all time points for the**  
 650 **FAS. N=40 for all timepoints.**

651

| Time  | Carrageenan-Sorbitol (CS) nasal spray |     |     |     |     |     | Saline solution (SS) |     |     |     |     |     |
|-------|---------------------------------------|-----|-----|-----|-----|-----|----------------------|-----|-----|-----|-----|-----|
|       | Mean                                  | SD  | LQ  | UQ  | Min | Max | Mean                 | SD  | LQ  | UQ  | Min | Max |
| 00:00 | 0.1                                   | 0.3 | 0.0 | 0.0 | 0   | 1   | 0.1                  | 0.3 | 0.0 | 0.0 | 0   | 1   |
| 00:15 | 0.8                                   | 0.5 | 0.0 | 1.0 | 0   | 2   | 0.7                  | 0.6 | 0.0 | 1.0 | 0   | 2   |
| 00:30 | 1.4                                   | 0.6 | 1.0 | 2.0 | 0   | 3   | 1.3                  | 0.6 | 1.0 | 2.0 | 0   | 2   |
| 00:45 | 1.7                                   | 0.7 | 1.0 | 2.0 | 0   | 3   | 1.6                  | 0.6 | 1.0 | 2.0 | 1   | 3   |
| 01:00 | 2.0                                   | 0.6 | 2.0 | 2.0 | 1   | 3   | 1.9                  | 0.6 | 2.0 | 2.0 | 1   | 3   |
| 01:15 | 2.0                                   | 0.7 | 2.0 | 2.0 | 0   | 3   | 1.9                  | 0.7 | 1.0 | 2.0 | 1   | 3   |
| 01:30 | 2.2                                   | 0.6 | 2.0 | 3.0 | 1   | 3   | 2.0                  | 0.6 | 2.0 | 2.0 | 1   | 3   |
| 01:45 | 2.3                                   | 0.7 | 2.0 | 3.0 | 1   | 3   | 2.2                  | 0.5 | 2.0 | 2.0 | 1   | 3   |
| 02:00 | 2.1                                   | 0.7 | 2.0 | 2.2 | 1   | 3   | 1.9                  | 0.6 | 1.8 | 2.0 | 1   | 3   |
| 02:15 | 2.2                                   | 0.7 | 2.0 | 3.0 | 1   | 3   | 2.0                  | 0.6 | 2.0 | 2.0 | 1   | 3   |
| 02:30 | 2.1                                   | 0.6 | 2.0 | 3.0 | 1   | 3   | 2.0                  | 0.7 | 2.0 | 2.2 | 1   | 3   |
| 02:45 | 2.1                                   | 0.7 | 2.0 | 3.0 | 1   | 3   | 2.0                  | 0.7 | 1.8 | 3.0 | 1   | 3   |
| 03:00 | 2.2                                   | 0.6 | 2.0 | 3.0 | 1   | 3   | 2.0                  | 0.7 | 2.0 | 2.2 | 1   | 3   |
| 03:15 | 2.1                                   | 0.7 | 2.0 | 3.0 | 1   | 3   | 2.0                  | 0.7 | 2.0 | 3.0 | 1   | 3   |
| 03:30 | 2.2                                   | 0.7 | 2.0 | 3.0 | 1   | 3   | 2.1                  | 0.7 | 2.0 | 3.0 | 1   | 3   |
| 03:45 | 2.2                                   | 0.7 | 2.0 | 3.0 | 1   | 3   | 2.1                  | 0.7 | 2.0 | 3.0 | 1   | 3   |
| 04:00 | 2.2                                   | 0.8 | 2.0 | 3.0 | 0   | 3   | 2.2                  | 0.7 | 2.0 | 3.0 | 1   | 3   |
| 04:15 | 2.1                                   | 0.8 | 2.0 | 3.0 | 0   | 3   | 2.1                  | 0.8 | 1.8 | 3.0 | 0   | 3   |
| 04:30 | 2.2                                   | 0.8 | 2.0 | 3.0 | 0   | 3   | 2.1                  | 0.7 | 2.0 | 3.0 | 1   | 3   |
| 04:45 | 2.2                                   | 0.7 | 2.0 | 3.0 | 1   | 3   | 2.2                  | 0.7 | 2.0 | 3.0 | 1   | 3   |
| 05:00 | 2.2                                   | 0.7 | 2.0 | 3.0 | 1   | 3   | 2.2                  | 0.7 | 2.0 | 3.0 | 1   | 3   |
| 05:15 | 2.4                                   | 0.7 | 2.0 | 3.0 | 1   | 3   | 2.2                  | 0.7 | 2.0 | 3.0 | 1   | 3   |
| 05:30 | 2.2                                   | 0.8 | 2.0 | 3.0 | 1   | 3   | 2.2                  | 0.7 | 2.0 | 3.0 | 1   | 3   |
| 05:45 | 2.3                                   | 0.7 | 2.0 | 3.0 | 1   | 3   | 2.2                  | 0.7 | 2.0 | 3.0 | 1   | 3   |
| 06:00 | 2.3                                   | 0.8 | 2.0 | 3.0 | 1   | 3   | 2.2                  | 0.7 | 2.0 | 3.0 | 1   | 3   |

652

653

654

Abbreviations: CS, carrageenan-sorbitol containing nasal spray. SS, saline solution; SD, standard deviation; LQ, lower quartile; UQ, upper quartile.



655 **Table S2: Clinical data: Mean difference in NCSS [Pre-treatment -  $\varnothing$ (2-4h)] for the FAS.**

656

|        | <b>CS</b>       | <b>SS</b>       | <b>CS – SS</b>  |
|--------|-----------------|-----------------|-----------------|
| Mean   | 0.16            | 0.11            | 0.02            |
| SD     | 0.50            | 0.53            | 0.66            |
| Median | 0.00            | 0.00            | 0.11            |
| Min    | -0.89           | -0.78           | -1.56           |
| Max    | 1.44            | 1.56            | 1.33            |
| N      | 40 <sup>1</sup> | 40 <sup>1</sup> | 39 <sup>2</sup> |

657

658 Abbreviations: NCSS, Nasal Congestion Symptom Score. CS, carrageenan-sorbitol containing nasal spray. SS, saline  
659 solution.

660

SD, standard deviation. Min, minimum value. Max, maximum value.

661

1 n = 40 out of 41 patients completed each treatment period

662

2 n = 39 out of 41 patients completed both treatment periods

663

664 **Table S3: Clinical data: Mean difference in AAR change from pre- to post-treatment**  
 665 **between CS and SS for the FAS.** Values for the respective treatment period are first calculated  
 666 individually by subtracting the mean pre-treatment airflow from the mean nasal airflow over the  
 667 indicated post-treatment time period. Differences between treatments are computed likewise by  
 668 subtracting the [mean pre- to post-treatment difference for SS] from the [mean pre- to post-  
 669 treatment difference for CS]. Paired t-tests were applied to those differences. Differences above 0  
 670 are favorable for the CS treatment.  
 671

| Observation interval            | Mean difference between CS and SS | 95% CI        | P-Value <sup>2</sup> |
|---------------------------------|-----------------------------------|---------------|----------------------|
| ø(2:00-6:00 h) - Pre-treatment  | 8.05                              | -24.05; 40.14 | 0.61                 |
| ø(2:15-6:00 h)) - Pre-treatment | 12.23                             | -21.80; 46.27 | 0.47                 |
| ø(2:30-6:00 h)) - Pre-treatment | 11.96                             | -22.55; 46.47 | 0.49                 |
| ø(3:00-6:00 h)) - Pre-treatment | 17.07                             | -17.02; 51.16 | 0.32                 |
| ø(3:30-6:00 h)) - Pre-treatment | 19.39                             | -14.34; 53.13 | 0.25                 |
| ø(4:00-6:00 h)) - Pre-treatment | 23.34                             | -10.92; 57.61 | 0.18                 |
| ø(4:30-6:00 h)) - Pre-treatment | 25.59                             | -10.87; 62.04 | 0.16                 |
| ø(5:00-6:00 h)) - Pre-treatment | 28.23                             | -12.68; 69.14 | 0.17                 |
| ø(5:30-6:00 h)) - Pre-treatment | 47.96                             | 5.14; 90.78   | 0.03                 |
| ø(6:00 h)) - Pre-treatment      | 54.29                             | 2.92; 105.66  | 0.04                 |

672

673 Abbreviations: CS, carrageenan-sorbitol containing nasal spray. SS, saline solution. CI, confidence interval.

674 <sup>1</sup> Mean Nasal Airflow, measured by active anterior rhinomanometry (AAR).

675 <sup>2</sup> Paired t-test

676

677

**Figure 1: Ex vivo assay: Hyperosmolar effect of CS nasal spray with and without sorbitol.** Weight decrease of ex-vivo porcine nasal mucosa after incubation for 60 minutes at 37°C in CS (carrageenan + 0.5% NaCl + 7% sorbitol in buffered aqueous solution), a 2.4% sodium chloride solution, or carrageenan + 0.5% NaCl in buffered aqueous solution without sorbitol (CS w/o sorbitol). Error bars represent standard deviation of replicates.

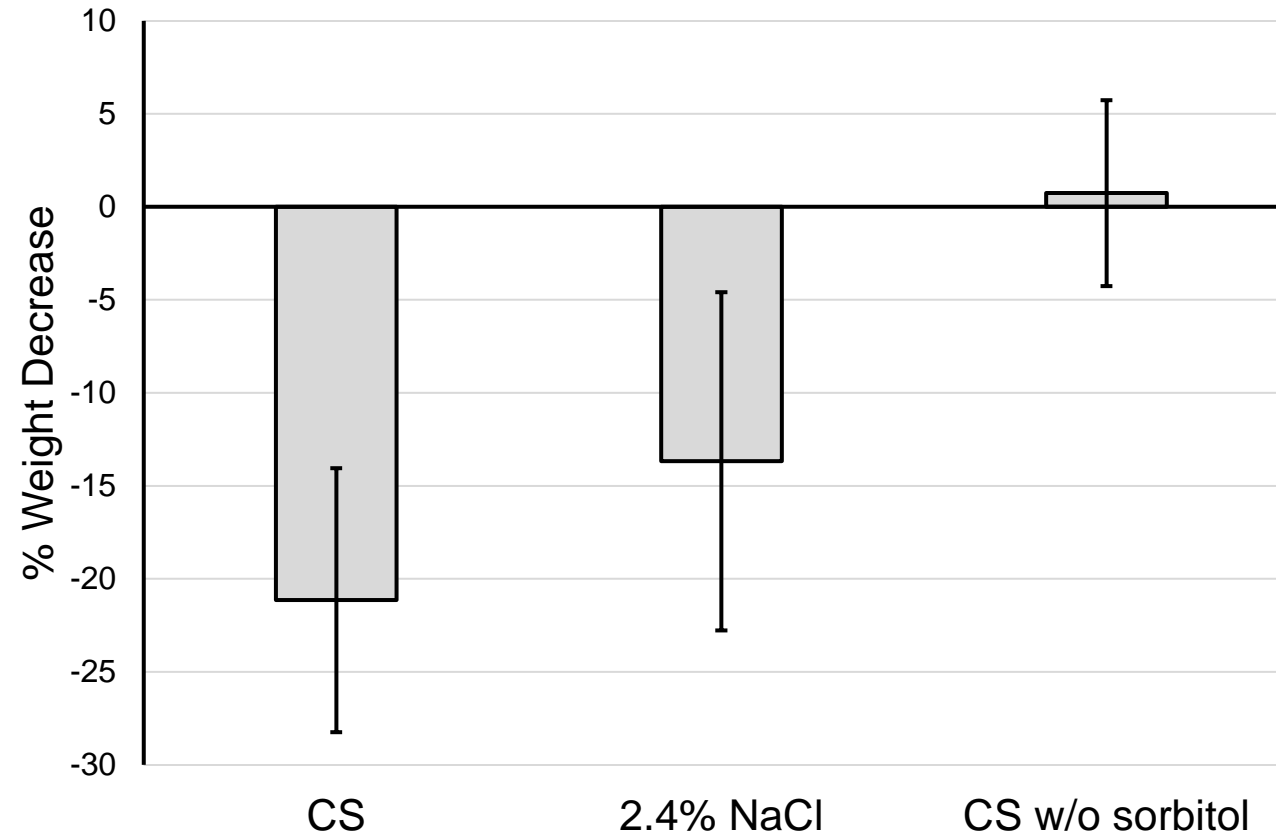

**Figure 2: In vitro assay: Barrier function of CS nasal spray.** Results of the percentage blocking activity of CS nasal spray relative to negative control (contains sorbitol and NaCl in same concentration as in CS but does not contain the barrier forming component carrageenan). Amounts of barrier-crossing beads were analyzed 180 minutes after application of beads. Cyan = % blocking activity for bead size of 0.3  $\mu\text{m}$ ; blue = % blocking activity for bead size of 1.0  $\mu\text{m}$ . Error bars represent standard deviation of replicates.

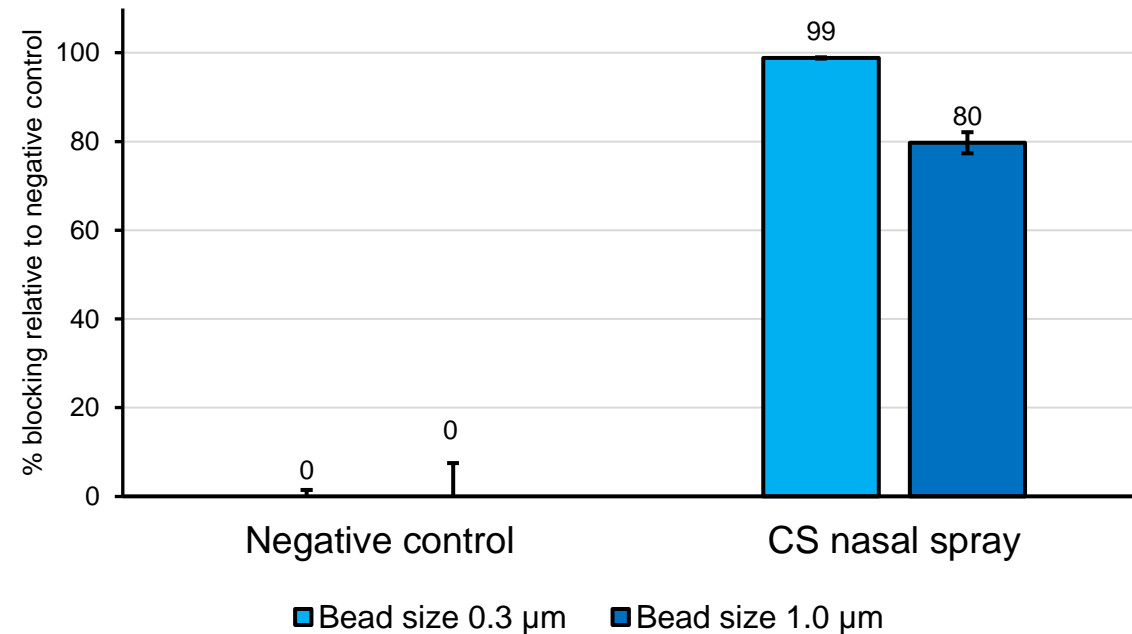

**Figure 3: Clinical Study: Graphical Abstract**  
**Panel A: Study Overview**

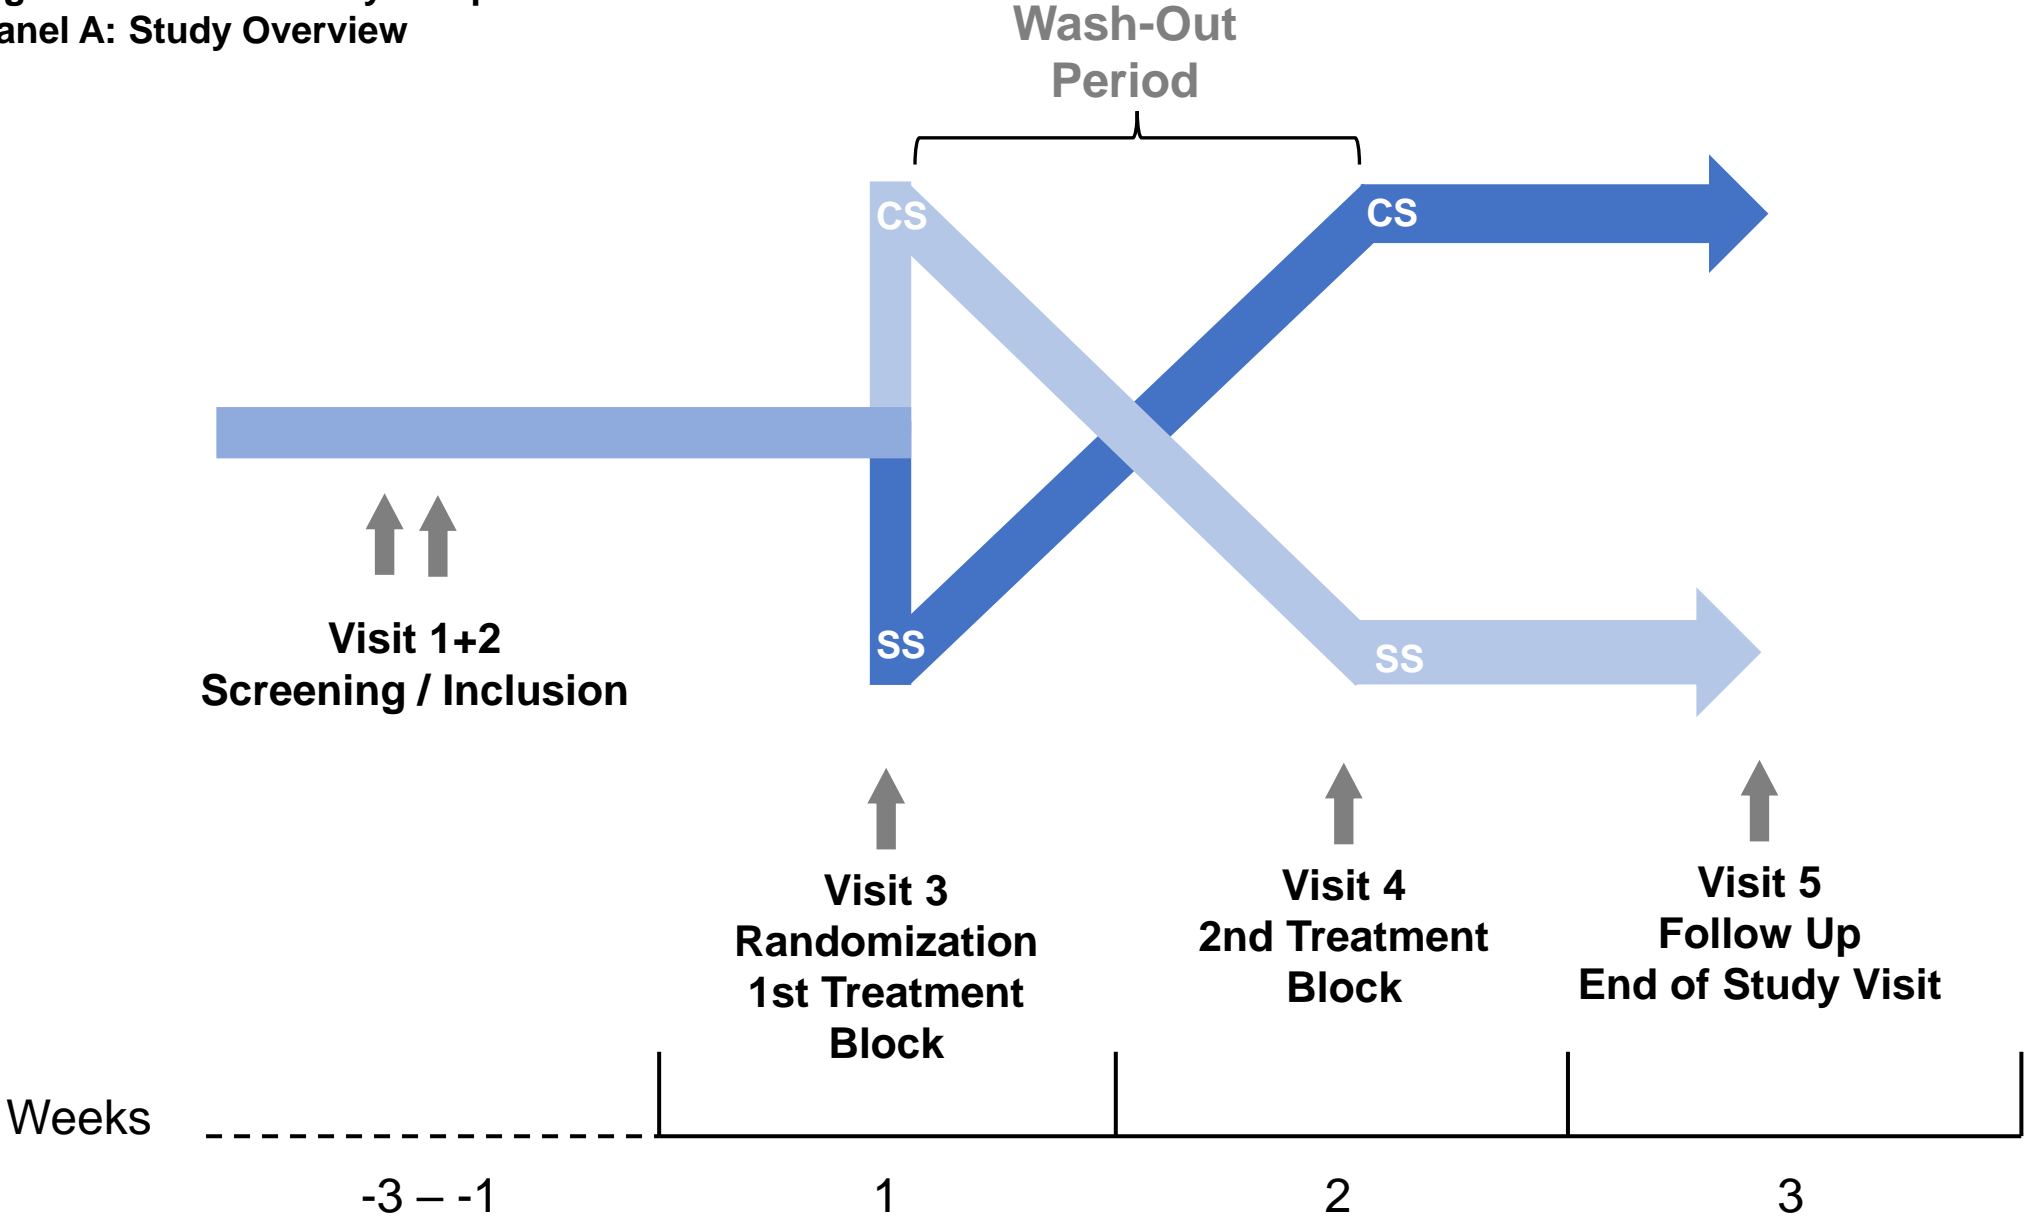

**Figure 3: Clinical Study: Graphical Abstract**  
**Panel B: Efficacy assessments carried out per treatment block.**

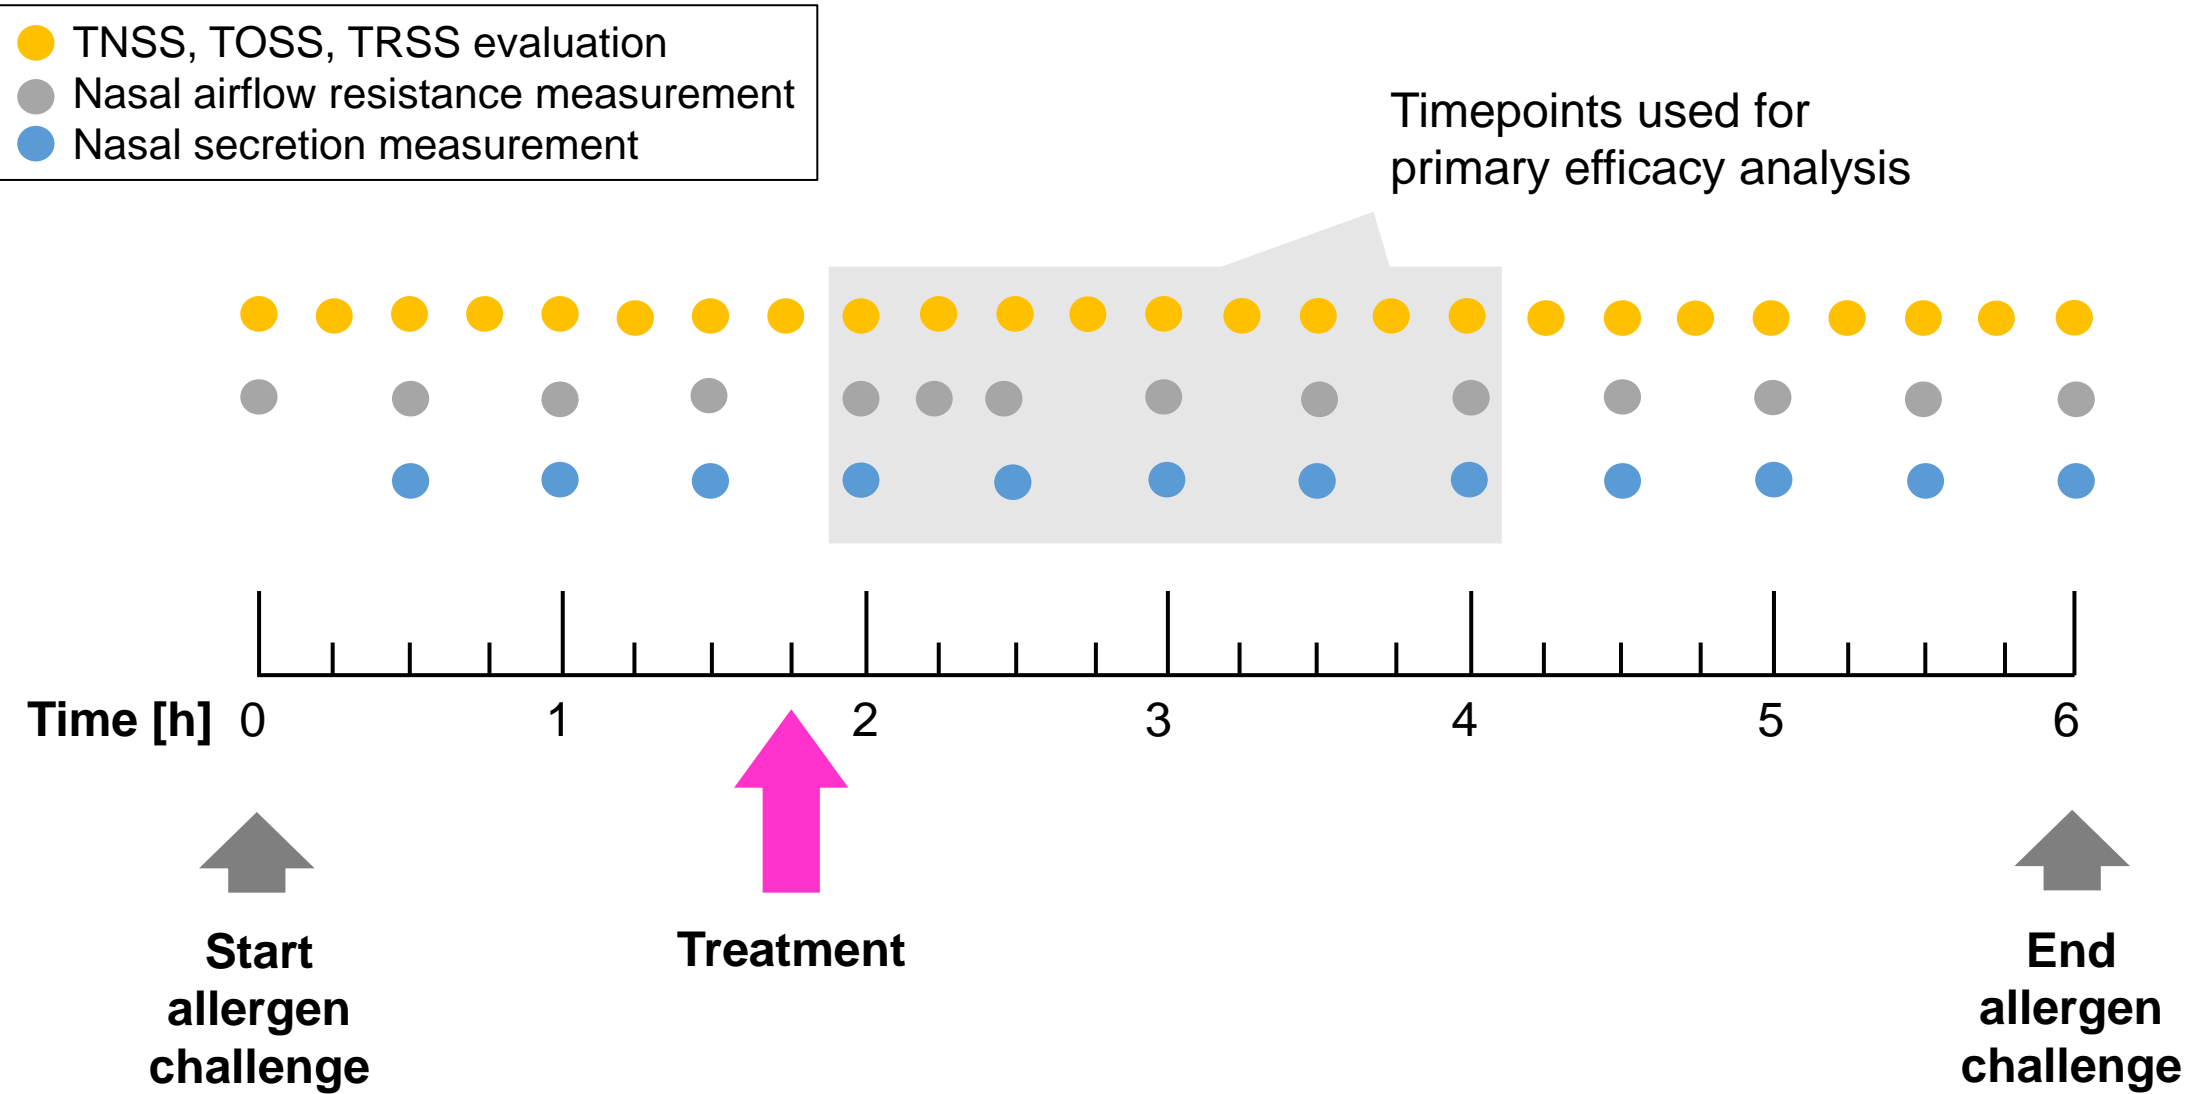

Figure 4: Clinical Study: CONSORT Flow Chart

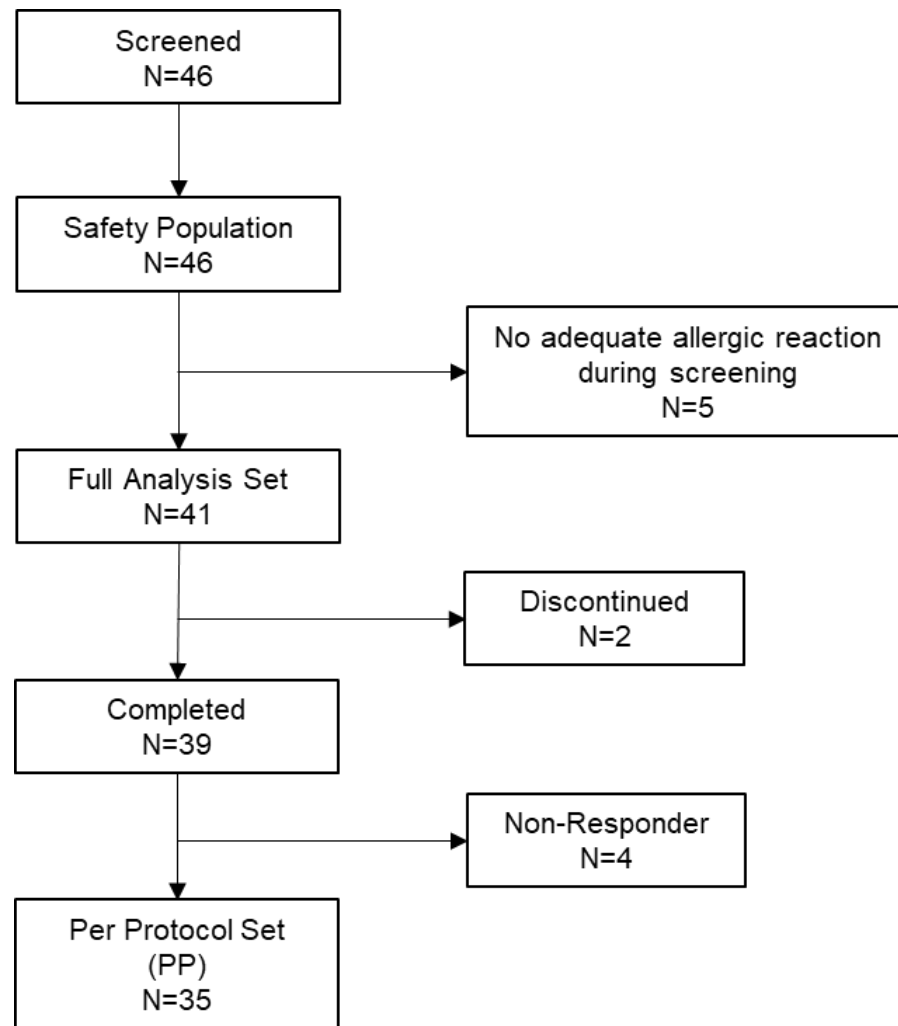

**Figure 5: Clinical data: Nasal Congestion Symptom Score (NCSS) pre- and post-treatment during the grass pollen allergen exposure challenge for the FAS.**

**Panel A:** Baseline corrected mean time course of nasal NCSS. The gray square highlights the timepoints used for the primary efficacy analysis.

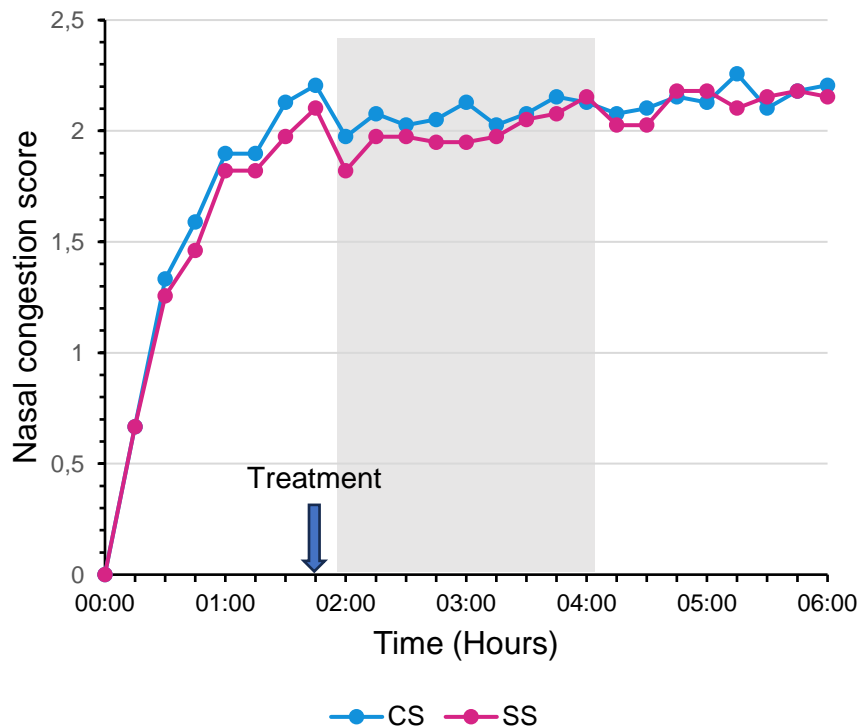

**Panel B:** Primary efficacy analysis: Mean difference of treatments (Mean NCSS  $\Delta$ [Pre-treatment -  $\emptyset$ (2-4h)]) and 95% CI for the FAS. The mean difference of CS – SS = 0.02, 95% CI [-0.19;0.24],  $p > 0.05$  (paired t-test).

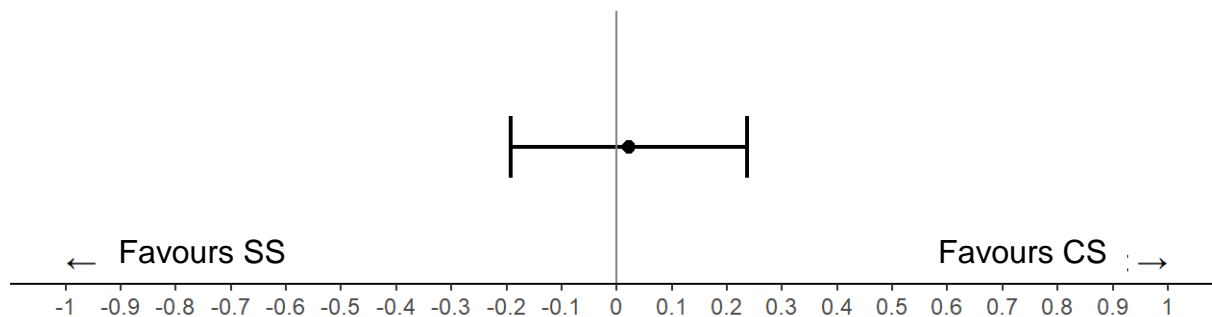



**Figure 6: Clinical data: Anterior nasal airflow before and after treatment for the FAS.** Mean airflow at timepoints 1h30min (before treatment) and 6h after start of allergen challenge. Error bars denote 95% CI.  $P=0.039$  for comparison between treatments in difference from pre-treatment to timepoint 360 min.

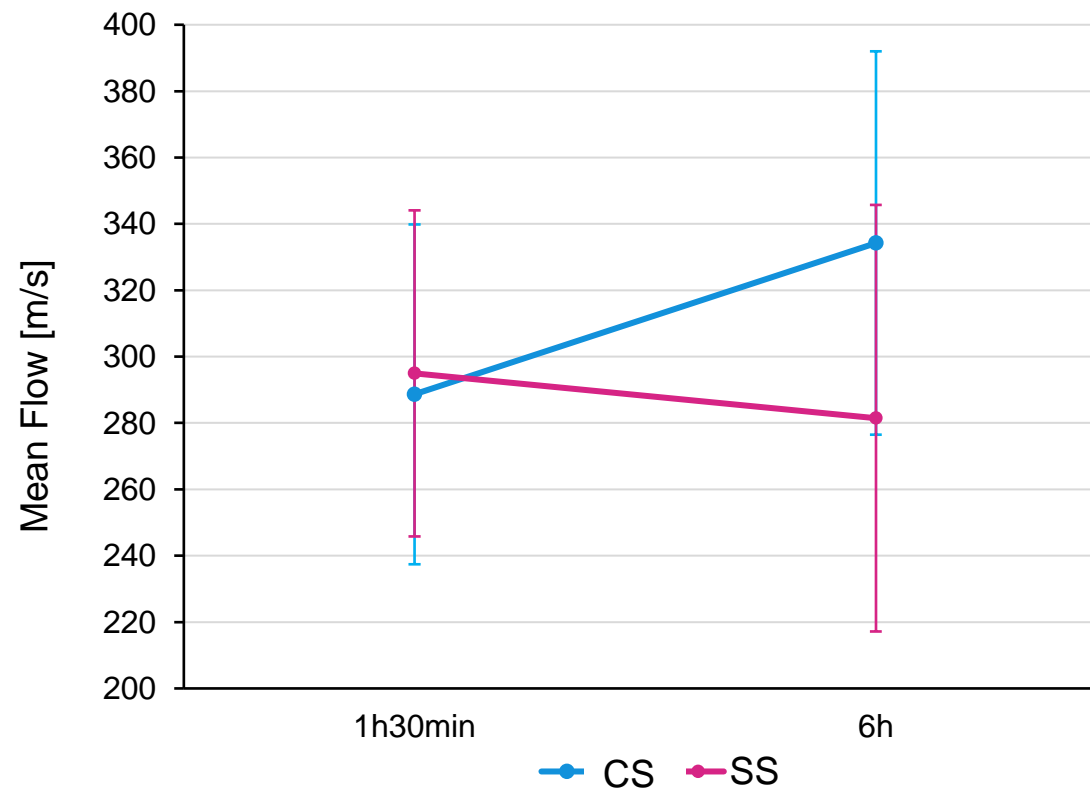

**Figure 7: Clinical data: Median nasal secretion absolute differences to pre-treatment for the FAS.** Differences in post-treatment nasal secretion compared to pre-treatment after CS treatment (cyan) and saline treatment (magenta). Positive values indicate lower nasal secretion post-treatment compared to pre-treatment.

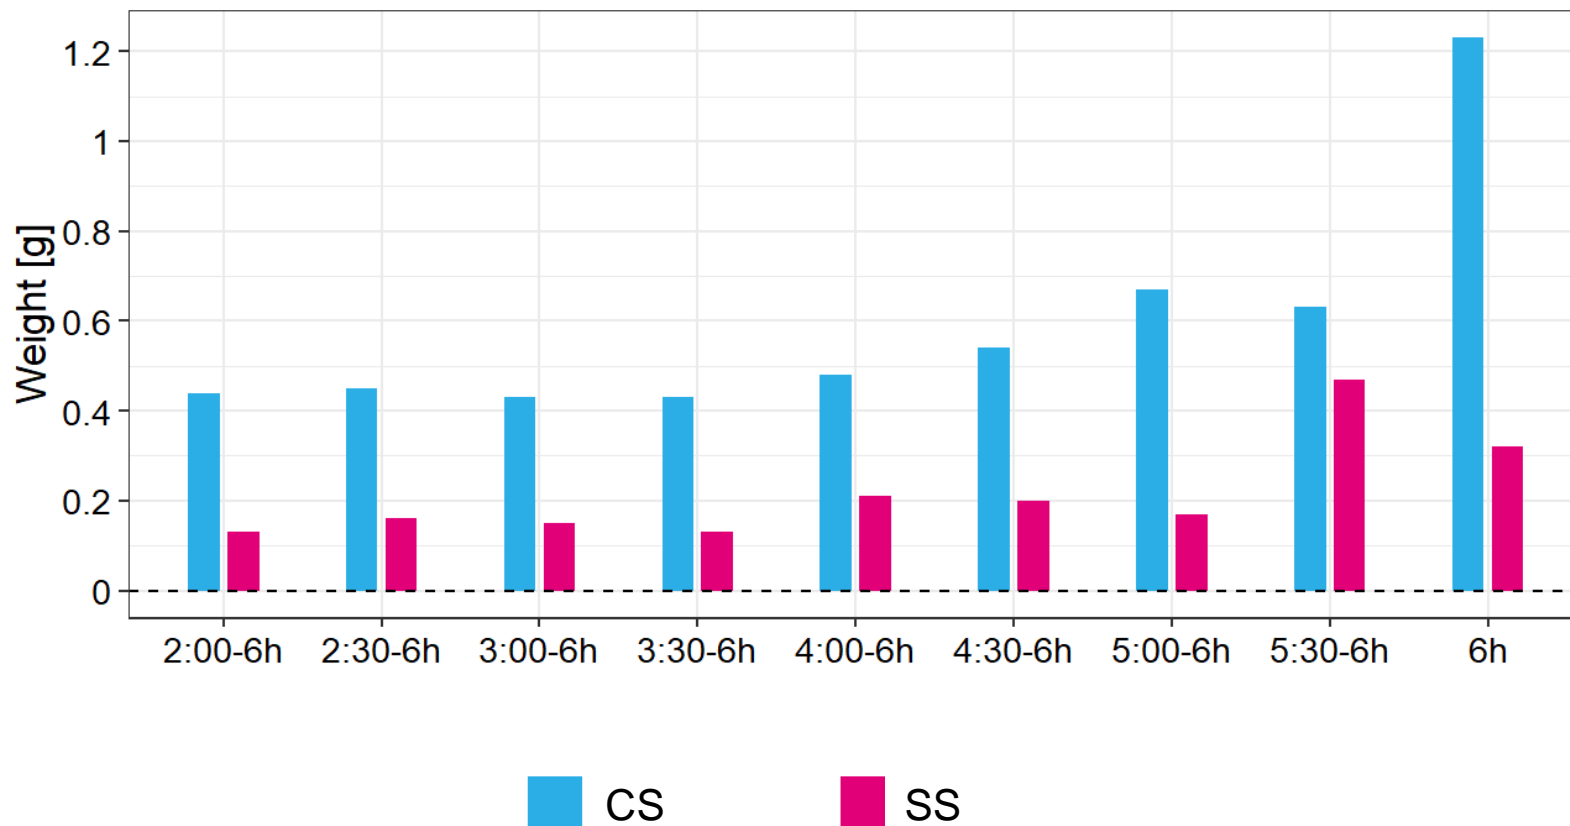

**Supplemental Figure S1: Clinical data: Median anterior nasal airflow absolute differences to pre-treatment for the FAS.** Differences in post-treatment nasal airflow compared to pre-treatment in the CS group (cyan) and the SS (magenta). Positive values indicate higher nasal airflow post-treatment, negative value indicate lower nasal airflow post-treatment compared to pre-treatment.

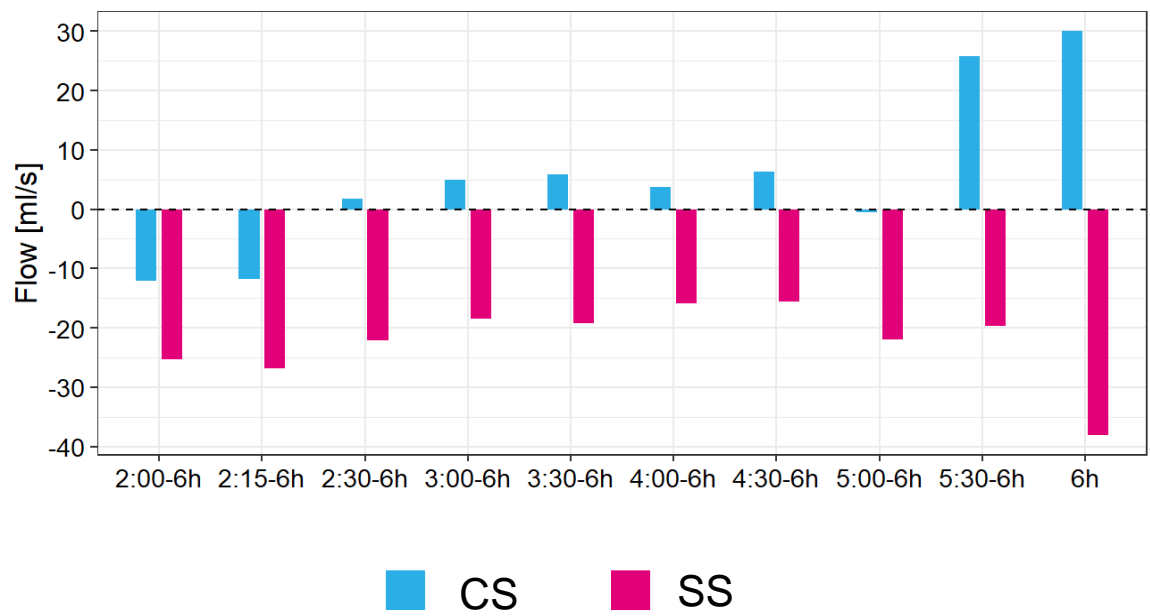

Source: https://medrxiv.org/content/10.1101/2024.05.03.24306805v1.full.pdf
